# Supplementary material for: Flagellar energy costs across the tree of life
Source: eLife. 2022 Jul 26;11:e77266. doi: 10.7554/eLife.77266 (PMC9323006; doi:10.7554/eLife.77266)
Supplement: Figure 1—figure supplement 1—source data 1. [file elife-77266-fig1-figsupp1-data1.xlsx]

## Sheet: Sheet1
Flagellum length for each unique flagellum (so a species can appear multiple times). For references see Figure 1-source data 1.
* Because of its ciliated nature Opalina ranarum is grouped with ciliates here, but in reality it belongs to a different phylum.
Species	Phylum	Cell volume (µm^3)	Number of flagella	Flagellum length (µm)
Breviata anathema	Amorphea	92.0391	1	15
Mastigamoeba psammobia	Amorphea	239.563	1	36
Mastigella simplex	Amorphea	121.88	1	17.5
Ancyromonas melba	Ancyromonadida	60.8214	2	4.6
Ancyromonas melba	Ancyromonadida	60.8214	2	10.8
Auranticordis quadriverberis	Cercozoa	87113.9	4	55
Helkesimastix marina	Cercozoa	29.4525	2	12.5
Chlamydomonas sp.	Chlorophyta	1150.35	2	6.3
Polytoma uvella	Chlorophyta	1393.82	2	39
Polytomella agilis	Chlorophyta	123.202	4	8.5
Pyramimonas octopus	Chlorophyta	731.175	8	17
Codonosiga botrytis	Choanoflagellata	196.35	1	30
Apocoleps caoi	Ciliates	129951	547	6
Apocoleps caoi	Ciliates	129951	547	30
Chilodonella acuta	Ciliates	5647.7	520	5
Chilodonella acuta	Ciliates	5647.7	520	10
Eurystomatella sinica	Ciliates	17504.4	850	10
Eurystomatella sinica	Ciliates	17504.4	850	30
Fusiforma themisticola	Ciliates	10601.5	2025	5.9
Kovalevaia sulcata	Ciliates	407989	670	7.5
Metanophrys orientalis	Ciliates	5026.56	391	7.5
Metanophrys orientalis	Ciliates	5026.56	391	15
Nolandia sinica	Ciliates	38484.6	289	9
Nolandia sinica	Ciliates	38484.6	289	20
Opalina ranarum	Ciliates*	2.29881e+06	100337	15
Parafurgasonia zhangi	Ciliates	9081.19	168	7
Paramecium caudatum	Ciliates	291943	14142	12
Paramecium tetraurelia	Ciliates	233735	4000	11
Tetrahymena thermophila	Ciliates	12365.3	750	5.5
Tiarina fusa	Ciliates	28634.4	561	5.5
Tiarina fusa	Ciliates	28634.4	561	17.5
Trachelocerca ditis	Ciliates	321050	1486	10.5
Tracheloraphis dragescoi	Ciliates	486913	11588	8.5
Uronemella sinensis	Ciliates	4810.57	211	10
Uronemella sinensis	Ciliates	4810.57	211	15
Chromera velia	Colpodellida	11.404	2	5.5
Chromera velia	Colpodellida	11.404	2	19
Colpodella pugnax	Colpodellida	169.717	2	18.75
Colpodella unguis	Colpodellida	74.8146	2	8.5
Colpodella unguis	Colpodellida	74.8146	2	13
Acavomonas peruviana	Colponemida	385.37	2	11.5
Acavomonas peruviana	Colponemida	385.37	2	23
Colponema edaphicum	Colponemida	64.141	2	10
Colponema edaphicum	Colponemida	64.141	2	20
Colponema globosum	Colponemida	1431.39	2	13
Colponema globosum	Colponemida	1431.39	2	30
Colponema loxodes	Colponemida	1627.28	2	23.5
Colponema loxodes	Colponemida	1627.28	2	35.5
Colponema marisrubri	Colponemida	162.357	2	11.25
Colponema marisrubri	Colponemida	162.357	2	22.5
Colponema symmetricum	Colponemida	257.36	2	21.75
Colponema symmetricum	Colponemida	257.36	2	43.5
Colponema vietnamica	Colponemida	216.394	2	6.3
Colponema vietnamica	Colponemida	216.394	2	18.8
Palustrimonas yorkeensis	Colponemida	180.621	2	11
Palustrimonas yorkeensis	Colponemida	180.621	2	25.5
Glissandra innuerende	CRuMs	143.794	2	16.25
Goniomonas amphinema	Cryptista	85.085	2	3.25
Goniomonas amphinema	Cryptista	85.085	2	7.5
Goniomonas pacifica	Cryptista	41.888	2	4
Ceratium fusus	Dinoflagellata	114040	2	200
Dinophysis acuta	Dinoflagellata	102953	2	65
Anisonema acinus	Euglenids	3706.3	2	39
Anisonema acinus	Euglenids	3706.3	2	67
Anisonema glaciale	Euglenids	2576.5	2	41
Anisonema glaciale	Euglenids	2576.5	2	81
Anisonema prosgeobium	Euglenids	2822.2	2	42
Anisonema prosgeobium	Euglenids	2822.2	2	84
Anisonema trepidum	Euglenids	372.018	2	22
Anisonema trepidum	Euglenids	372.018	2	49
Dinema validum	Euglenids	7866.11	2	34.5
Dinema validum	Euglenids	7866.11	2	97.5
Dolium sedentarium	Euglenids	11023.9	2	3
Dolium sedentarium	Euglenids	11023.9	2	10
Euglena gracilis	Euglenids	5301.45	1	45
Euglena viridis	Euglenids	7868.66	1	72
Heteronema exaratum	Euglenids	1548.55	2	17.5
Heteronema globuliferum	Euglenids	348.718	2	42
Heteronema globuliferum	Euglenids	348.718	2	28
Heteronema splendens	Euglenids	23562	2	100
Heteronema splendens	Euglenids	23562	2	66
Heteronema vittatum	Euglenids	3534.3	2	30
Heteronema vittatum	Euglenids	3534.3	2	60
Menoidium cultellus	Euglenids	1154.54	1	21
Notosolenus alatellus	Euglenids	551.351	2	13
Notosolenus alatellus	Euglenids	551.351	2	9.8
Notosolenus apocamptus	Euglenids	88.0172	2	20
Notosolenus apocamptus	Euglenids	88.0172	2	7.5
Notosolenus apocamptus	Euglenids	216.77	2	23
Notosolenus apocamptus	Euglenids	216.77	2	8.65
Notosolenus canellatus	Euglenids	624.197	2	24.75
Notosolenus canellatus	Euglenids	624.197	2	16.5
Notosolenus canellatus	Euglenids	624.197	2	24.75
Notosolenus canellatus	Euglenids	624.197	2	16.5
Notosolenus esulcis	Euglenids	890.12	2	17
Notosolenus esulcis	Euglenids	890.12	2	13
Notosolenus navicula	Euglenids	435.635	2	25
Notosolenus navicula	Euglenids	435.635	2	14
Notosolenus ostium	Euglenids	1691.23	2	20
Notosolenus ostium	Euglenids	1691.23	2	55
Notosolenus ostium	Euglenids	5131.28	2	42
Notosolenus ostium	Euglenids	5131.28	2	8
Notosolenus scutulum	Euglenids	636.174	2	30
Notosolenus scutulum	Euglenids	636.174	2	5
Notosolenus similis	Euglenids	614.968	2	22
Notosolenus similis	Euglenids	614.968	2	7.25
Notosolenus tamanduensis	Euglenids	6073.76	2	29
Notosolenus tamanduensis	Euglenids	6073.76	2	10
Notosolenus triangularis	Euglenids	9163	2	42
Notosolenus triangularis	Euglenids	9163	2	9
Notosolenus urceolatus	Euglenids	1281.05	2	18.5
Notosolenus urceolatus	Euglenids	1281.05	2	14.5
Peranema fusiforme	Euglenids	404.468	2	27.5
Peranema fusiforme	Euglenids	404.468	2	8
Peranema trichophorum	Euglenids	4146.91	1	40
Peranema trichophorum	Euglenids	13987.5	2	79
Petalomonas abscissa	Euglenids	348.188	1	27.25
Petalomonas boadicea	Euglenids	230.908	1	10
Petalomonas marginalis	Euglenids	679.044	2	26
Petalomonas minor	Euglenids	19.0067	1	8
Petalomonas minuta	Euglenids	26.3894	1	7.5
Petalomonas pusilla	Euglenids	16.3625	1	7.5
Ploeotia adhaerens	Euglenids	906.666	2	22
Ploeotia adhaerens	Euglenids	906.666	2	36
Ploeotia azurina	Euglenids	346.361	2	13.5
Ploeotia azurina	Euglenids	346.361	2	37
Ploeotia corrugata	Euglenids	197.986	2	12.5
Ploeotia corrugata	Euglenids	197.986	2	31.5
Ploeotia costata	Euglenids	1456.55	2	19
Ploeotia costata	Euglenids	1456.55	2	44
Ploeotia decipiens	Euglenids	314.317	2	18
Ploeotia decipiens	Euglenids	314.317	2	36
Ploeotia heracleum	Euglenids	109.956	2	14
Ploeotia heracleum	Euglenids	109.956	2	28
Ploeotia longifilum	Euglenids	1013.69	2	17.5
Ploeotia longifilum	Euglenids	1013.69	2	74
Ploeotia oblonga	Euglenids	1960.36	2	26
Ploeotia oblonga	Euglenids	1960.36	2	61
Ploeotia pseudanisonema	Euglenids	1027.65	2	18.5
Ploeotia pseudanisonema	Euglenids	1027.65	2	65
Ploeotia punctata	Euglenids	133.531	2	18.5
Ploeotia punctata	Euglenids	133.531	2	32
Ploeotia tenuis	Euglenids	282.744	2	18
Ploeotia tenuis	Euglenids	282.744	2	36
Ploeotia vitrea	Euglenids	1763.19	2	23
Ploeotia vitrea	Euglenids	1763.19	2	46
Pseudoperanema (Peranema) fusiforme	Euglenids	3873.8	2	60.5
Pseudoperanema (Peranema) trichophorum	Euglenids	510.342	2	28
Pseudoperanema (Peranema) trichophorum	Euglenids	510.342	2	21
Pseudoperanema dolichonema	Euglenids	619.419	2	45
Pseudoperanema dolichonema	Euglenids	619.419	2	30
Rhabdomonas spiralis	Euglenids	2094.4	1	27
Urceolus cornutus	Euglenids	3534.3	2	30
Urceolus cristatus	Euglenids	1881.69	1	41.5
Bodo designis	Euglenozoa	70.5551	2	25
Bodo designis	Euglenozoa	70.5551	2	11
Diplonema ambulator	Euglenozoa	454.519	2	3.5
Cyanophora cuspidata	Glaucophyta	21.7785	2	5.5
Developayella elegans	Gyrista	50.2656	2	10.8
Developayella elegans	Gyrista	50.2656	2	13.8
Hemimastix amphikineta	Hemimastigophora	643.112	24	8.5
Hemimastix kukwesjijk	Hemimastigophora	939.12	36	6
Spironema goodeyi	Hemimastigophora	293.216	12	10
Spironema multiciliatum	Hemimastigophora	52.36	19	2.5
Spironema terricola	Hemimastigophora	256.564	16	10
Stereonema geiseri	Hemimastigophora	553.053	24	11
Pleurostomum flabellatum	Heterolobosea	25.1328	2	21.5
Pleurostomum flabellatum	Heterolobosea	80.1762	2	13.25
Pleurostomum turgidum	Heterolobosea	66.0129	2	23.5
Stephanopogon minuta	Heterolobosea	2099.21	128	11.2
Bodo cygnus	Kinetoplastea	88.0172	2	9
Bodo cygnus	Kinetoplastea	88.0172	2	20
Bodo platyrhynchus	Kinetoplastea	25.9182	2	2.8
Bodo platyrhynchus	Kinetoplastea	25.9182	2	17.6
Bodo saliens	Kinetoplastea	22.5312	2	24
Bodo saliens	Kinetoplastea	22.5312	2	10
Bodo saltans	Kinetoplastea	143.794	2	6.5
Bodo saltans	Kinetoplastea	143.794	2	13.5
Bordnamonas tropicana	Kinetoplastea	47.124	2	11
Bordnamonas tropicana	Kinetoplastea	47.124	2	13
Rhynchobodo simius	Kinetoplastea	87.9648	2	13.5
Rhynchobodo simius	Kinetoplastea	87.9648	2	21.25
Rhynchomonas nasuta	Kinetoplastea	57.7269	2	16
Strigomonas oncopelti	Kinetoplastea	29.0242	1	17
Trypanosoma brucei	Kinetoplastea	160.352	1	30
Trypanosoma cruzi	Kinetoplastea	41.888	1	12.4
Carpediemonas membranifera	Metamonada	67.0208	2	8
Carpediemonas membranifera	Metamonada	67.0208	2	33
Dysnectes brevis	Metamonada	240.324	2	11.75
Dysnectes brevis	Metamonada	240.324	2	8.9
Ergobibamus cyprinoides	Metamonada	117.81	2	20.25
Ergobibamus cyprinoides	Metamonada	117.81	2	9
Hicanonectes teleskopos	Metamonada	149.718	2	25.5
Hicanonectes teleskopos	Metamonada	149.718	2	10.65
Iotanema spirale	Metamonada	76.3278	1	30
Kipferlia bialata	Metamonada	285.375	2	19.5
Kipferlia bialata	Metamonada	285.375	2	13
Ciliophrys infusionum	Ochrophyta	75.7666	1	14
Ochromonas malhamensis	Ochrophyta	14.1372	1	23.1
Bicosoeca conica	Opalozoa	27.6117	1	8.5
Caecitellus parvulus	Opalozoa	50.9651	2	6.4
Caecitellus parvulus	Opalozoa	50.9651	2	12.9
Cafeteria ligulifera	Opalozoa	87.1139	2	16.5
Cafeteria ligulifera	Opalozoa	87.1139	2	11
Cafeteria ligulifera	Opalozoa	33.5104	2	10
Cafeteria marsupialis	Opalozoa	104.689	2	10
Cafeteria minuta	Opalozoa	27.6117	2	11
Cafeteria minuta	Opalozoa	27.6117	2	5
Cafeteria roenbergensis	Opalozoa	24.2335	2	6.75
Cafeteria roenbergensis	Opalozoa	24.2335	2	4.25
Cafeteria roenbergensis	Opalozoa	18.4726	2	6.5
Cafeteria roenbergensis	Opalozoa	18.4726	2	5
Halocafeteria	Opalozoa	23.562	2	9
Pseudobodo tremulans	Opalozoa	65.45	2	10
Pseudobodo tremulans	Opalozoa	65.45	2	7.5
Pseudobodo tremulans	Opalozoa	33.5104	2	12.5
Pseudobodo tremulans	Opalozoa	33.5104	2	7.5
Cthulhu macrofasciculumque	Parabasalids	881.269	20	31
Eucomonympha imla	Parabasalids	994372	52000	8
Eucomonympha imla	Parabasalids	994372	52000	23
Holomastigotes lanceolata	Parabasalids	18849.6	744	12
Hoplonympha natator	Parabasalids	7330.4	135	15
Joenopsis intermedia	Parabasalids	530145	2000	65
Pachyjoenia howa	Parabasalids	441787	1800	39
Tritrichomonas foetus	Parabasalids	343.164	4	12.3
Tritrichomonas foetus	Parabasalids	343.164	4	29
Psammosa pacifica	Perkinsidae	79.5217	2	7.5
Psammosa pacifica	Perkinsidae	79.5217	2	15
Picomonas judraskeda	Picozoa	8.34978	2	13
Picomonas judraskeda	Picozoa	8.34978	2	8
Blattamonas junai gen. et sp. nov. Z98GC	Preaxostyla	41.5843	4	20.9
Blattamonas junai gen. et sp. nov. Z98GC	Preaxostyla	41.5843	4	9.5
Blattamonas junai gen. et sp. nov. Z98GC	Preaxostyla	41.5843	4	9.7
Blattamonas nauphoetae gen. et sp. nov. NAU3	Preaxostyla	32.0799	4	17.9
Blattamonas nauphoetae gen. et sp. nov. NAU3	Preaxostyla	32.0799	4	9.2
Blattamonas nauphoetae gen. et sp. nov. NAU3	Preaxostyla	32.0799	4	10.1
Blattamonas nauphoetae gen. et sp. nov. Z17NC	Preaxostyla	38.6794	4	18.7
Blattamonas nauphoetae gen. et sp. nov. Z17NC	Preaxostyla	38.6794	4	9.5
Blattamonas nauphoetae gen. et sp. nov. Z17NC	Preaxostyla	38.6794	4	10.5
Blattamonas varadinovae gen. et sp. Nov. Z31SE	Preaxostyla	33.0716	4	16.9
Blattamonas varadinovae gen. et sp. Nov. Z31SE	Preaxostyla	33.0716	4	8.9
Blattamonas varadinovae gen. et sp. Nov. Z31SE	Preaxostyla	33.0716	4	9.7
Monocercomonoides acer sp. nov. TENE79	Preaxostyla	42.3404	4	22.1
Monocercomonoides acer sp. nov. TENE79	Preaxostyla	42.3404	4	13.8
Monocercomonoides acer sp. nov. TENE79	Preaxostyla	42.3404	4	13
Monocercomonoides communis sp. nov. BAT1	Preaxostyla	87.703	4	22.8
Monocercomonoides communis sp. nov. BAT1	Preaxostyla	87.703	4	15
Monocercomonoides communis sp. nov. BAT1	Preaxostyla	87.703	4	14.6
Monocercomonoides communis sp. nov. Z30BD_1	Preaxostyla	45.4652	4	23
Monocercomonoides communis sp. nov. Z30BD_1	Preaxostyla	45.4652	4	14.7
Monocercomonoides communis sp. nov. Z30BD_1	Preaxostyla	45.4652	4	14
Monocercomonoides exilis CAVIA-M	Preaxostyla	27.1717	4	16.7
Monocercomonoides exilis CAVIA-M	Preaxostyla	27.1717	4	10.7
Monocercomonoides exilis CAVIA-M	Preaxostyla	27.1717	4	10
Monocercomonoides exilis PA203	Preaxostyla	37.2018	4	20.1
Monocercomonoides exilis PA203	Preaxostyla	37.2018	4	11
Monocercomonoides exilis PA203	Preaxostyla	37.2018	4	10.7
Monocercomonoides melolonthae POTCUPRI	Preaxostyla	122.485	4	26.4
Monocercomonoides melolonthae POTCUPRI	Preaxostyla	122.485	4	19.7
Monocercomonoides melolonthae POTCUPRI	Preaxostyla	122.485	4	20.1
Monocercomonoides merkovicensis sp. nov. MAREK 2	Preaxostyla	86.7443	4	26.4
Monocercomonoides merkovicensis sp. nov. MAREK 2	Preaxostyla	86.7443	4	19.7
Monocercomonoides merkovicensis sp. nov. MAREK 2	Preaxostyla	86.7443	4	20.1
Monocercomonoides merkovicensis sp. nov. VAV1B	Preaxostyla	103.824	4	24.8
Monocercomonoides merkovicensis sp. nov. VAV1B	Preaxostyla	103.824	4	15.1
Monocercomonoides merkovicensis sp. nov. VAV1B	Preaxostyla	103.824	4	18.9
Monocercomonoides sp. B1-10	Preaxostyla	32.5014	4	18.1
Monocercomonoides sp. B1-10	Preaxostyla	32.5014	4	11.4
Monocercomonoides sp. B1-10	Preaxostyla	32.5014	4	11.3
Monocercomonoides sp. CYRT	Preaxostyla	35.919	4	27.7
Monocercomonoides sp. CYRT	Preaxostyla	35.919	4	13.1
Monocercomonoides sp. LEI	Preaxostyla	38.6794	4	20.4
Monocercomonoides sp. LEI	Preaxostyla	38.6794	4	12.6
Monocercomonoides sp. LEI	Preaxostyla	38.6794	4	11.6
Monocercomonoides sp. MURAL 1	Preaxostyla	62.5571	4	21.8
Monocercomonoides sp. MURAL 1	Preaxostyla	62.5571	4	12.9
Monocercomonoides sp. MURAL 1	Preaxostyla	62.5571	4	12.1
Monocercomonoides sp. OEV	Preaxostyla	66.9035	4	25.3
Monocercomonoides sp. OEV	Preaxostyla	66.9035	4	14.5
Opisthomitus longiflagellatus	Preaxostyla	47.124	4	45
Trimastix convexa	Preaxostyla	670.208	4	30
Trimastix convexa	Preaxostyla	670.208	4	20
Rhodelphis limneticus	Rhodophyta	385.37	2	11.5
Rhodelphis limneticus	Rhodophyta	385.37	2	17.25
Rhodelphis marinus	Rhodophyta	345.936	2	12
Rhodelphis marinus	Rhodophyta	345.936	2	22
Anaeramoeba gargantua sp. nov., strain SIPEK1	Unclear	17974.2	3	40
Anaeramoeba ignava sp. nov., strain BMAN	Unclear	1767.15	2	16
Ancoracysta twista	Unclear	87.9648	2	9
Ancoracysta twista	Unclear	87.9648	2	13
Idionectes vortex	Unclear	502.656	1	36
Monas stigmata	Unclear	113.098	2	3
Monas stigmata	Unclear	113.098	2	15
Dinematomonas inaequalis	Unclear (Excavata)	2024.11	2	28
Dinematomonas inaequalis	Unclear (Excavata)	2024.11	2	42
Dinematomonas litoralis	Unclear (Excavata)	18326	2	56
Dinematomonas litoralis	Unclear (Excavata)	18326	2	94.5
Dinematomonas maculata	Unclear (Excavata)	2337.35	2	31
Dinematomonas valida	Unclear (Excavata)	2767.36	2	37
Dinematomonas valida	Unclear (Excavata)	2767.36	2	74
