# Supplementary material for: Flagellar energy costs across the tree of life
Source: eLife. 2022 Jul 26;11:e77266. doi: 10.7554/eLife.77266 (PMC9323006; doi:10.7554/eLife.77266)
Supplement: Figure 1—figure supplement 1—source data 2. [file elife-77266-fig1-figsupp1-data2.xlsx]

## Sheet: Sheet1
For references see Figure 1-source data 1.
* Because of its ciliated nature Opalina ranarum is grouped with ciliates here, but in reality it belongs to a different phylum.
Species	Domain	Phylum	Cell length (µm)	Cell width (µm)	Cell depth (µm)	Cell volume (µm^3)	Aspect ratio
Breviata anathema	Eukaryota	Amorphea	12.5	3.75	3.75	92.0391	3.33333
Mastigamoeba psammobia	Eukaryota	Amorphea	12.5	6.05	6.05	239.563	2.06612
Mastigella simplex	Eukaryota	Amorphea	9.5	4.95	4.95	121.88	1.91919
Ancyromonas melba	Eukaryota	Ancyromonadida	6	4.4	4.4	60.8214	1.36364
Helkesimastix marina	Eukaryota	Cercozoa	6.25	3	3	29.4525	2.08333
Auranticordis quadriverberis	Eukaryota	Cercozoa	55	55	55	87113.9	1
Chlamydomonas sp.	Eukaryota	Chlorophyta	13	13	13	1150.35	1
Polytoma uvella	Eukaryota	Chlorophyta	22	11	11	1393.82	2
Polytomella agilis	Eukaryota	Chlorophyta	9.8	4.9	4.9	123.202	2
Pyramimonas octopus	Eukaryota	Chlorophyta	17.05	9.05	9.05	731.175	1.88398
Codonosiga botrytis	Eukaryota	Choanoflagellata	15	5	5	196.35	3
Apocoleps caoi	Eukaryota	Ciliates	110	47.5	47.5	129951	2.31579
Chilodonella acuta	Eukaryota	Ciliates	39	22	12.5714	5647.7	2.3451
Eurystomatella sinica	Eukaryota	Ciliates	57.5	34.1	17.05	17504.4	2.38467
Fusiforma themisticola	Eukaryota	Ciliates	72.6	16.7	16.7	10601.5	4.34731
Kovalevaia sulcata	Eukaryota	Ciliates	487	40	40	407989	12.175
Metanophrys orientalis	Eukaryota	Ciliates	37.5	16	16	5026.56	2.34375
Nolandia sinica	Eukaryota	Ciliates	60	35	35	38484.6	1.71429
Opalina ranarum	Eukaryota	Ciliates*	350	112	112	2.29881e+06	3.125
Parafurgasonia zhangi	Eukaryota	Ciliates	55.5	25	12.5	9081.19	3.13955
Paramecium caudatum	Eukaryota	Ciliates	242	48	48	291943	5.04167
Paramecium tetraurelia	Eukaryota	Ciliates	124	60	60	233735	2.06667
Tetrahymena thermophila	Eukaryota	Ciliates	41	24	24	12365.3	1.70833
Tiarina fusa	Eukaryota	Ciliates	87.5	25	25	28634.4	3.5
Trachelocerca ditis	Eukaryota	Ciliates	180.4	58.3	58.3	321050	3.09434
Tracheloraphis dragescoi	Eukaryota	Ciliates	433.8	46.3	46.3	486913	9.36933
Uronemella sinensis	Eukaryota	Ciliates	30	17.5	17.5	4810.57	1.71429
Chromera velia	Eukaryota	Colpodellida	4.5	2.2	2.2	11.404	2.04545
Colpodella pugnax	Eukaryota	Colpodellida	13.5	4.9	4.9	169.717	2.7551
Colpodella unguis	Eukaryota	Colpodellida	8.5	4.1	4.1	74.8146	2.07317
Acavomonas peruviana	Eukaryota	Colponemida	11.5	8	8	385.37	1.4375
Colponema vietnamica	Eukaryota	Colponemida	12.5	5.75	5.75	216.394	2.17391
Palustrimonas yorkeensis	Eukaryota	Colponemida	11	5.6	5.6	180.621	1.96429
Colponema edaphicum	Eukaryota	Colponemida	10	3.5	3.5	64.141	2.85714
Colponema globosum	Eukaryota	Colponemida	15	13.5	13.5	1431.39	1.11111
Colponema loxodes	Eukaryota	Colponemida	23.5	11.5	11.5	1627.28	2.04348
Colponema marisrubri	Eukaryota	Colponemida	11.25	5.25	5.25	162.357	2.14286
Colponema symmetricum	Eukaryota	Colponemida	12	6.4	6.4	257.36	1.875
Glissandra innuerende	Eukaryota	CRuMs	6.5	6.5	6.5	143.794	1
Goniomonas amphinema	Eukaryota	Cryptista	6.5	5	5	85.085	1.3
Goniomonas pacifica	Eukaryota	Cryptista	5	4	4	41.888	1.25
Ceratium fusus	Eukaryota	Dinoflagellata	450	22	22	114040	20.4545
Dinophysis acuta	Eukaryota	Dinoflagellata	65	55	55	102953	1.18182
Dinema validum	Eukaryota	Euglenids	32.5	21.5	21.5	7866.11	1.51163
Dolium sedentarium	Eukaryota	Euglenids	43.5	22	22	11023.9	1.97727
Euglena gracilis	Eukaryota	Euglenids	45	15	15	5301.45	3
Peranema trichophorum	Eukaryota	Euglenids	55	12	12	4146.91	4.58333
Peranema trichophorum	Eukaryota	Euglenids	74	19	19	13987.5	3.89474
Petalomonas marginalis	Eukaryota	Euglenids	25	12.5	4.15	679.044	3.47105
Ploeotia azurina	Eukaryota	Euglenids	13.5	7	7	346.361	1.92857
Ploeotia longifilum	Eukaryota	Euglenids	16	11	11	1013.69	1.45455
Ploeotia oblonga	Eukaryota	Euglenids	26	12	12	1960.36	2.16667
Ploeotia vitrea	Eukaryota	Euglenids	23	12.1	12.1	1763.19	1.90083
Urceolus cornutus	Eukaryota	Euglenids	30	15	15	3534.3	2
Anisonema acinus	Eukaryota	Euglenids	26	16.5	16.5	3706.3	1.57576
Anisonema glaciale	Eukaryota	Euglenids	27	13.5	13.5	2576.5	2
Anisonema prosgeobium	Eukaryota	Euglenids	27.5	14	14	2822.2	1.96429
Anisonema trepidum	Eukaryota	Euglenids	14.5	7	7	372.018	2.07143
Euglena viridis	Eukaryota	Euglenids	52	17	17	7868.66	3.05882
Heteronema exaratum	Eukaryota	Euglenids	17.5	13	13	1548.55	1.34615
Heteronema globuliferum	Eukaryota	Euglenids	18.5	6	6	348.718	3.08333
Heteronema splendens	Eukaryota	Euglenids	200	15	15	23562	13.3333
Heteronema vittatum	Eukaryota	Euglenids	30	15	15	3534.3	2
Menoidium cultellus	Eukaryota	Euglenids	45	7	7	1154.54	6.42857
Notosolenus alatellus	Eukaryota	Euglenids	13	9	9	551.351	1.44444
Notosolenus apocamptus	Eukaryota	Euglenids	10	4.1	4.1	88.0172	2.43902
Notosolenus apocamptus	Eukaryota	Euglenids	11.5	6	6	216.77	1.91667
Notosolenus canellatus	Eukaryota	Euglenids	16.5	8.5	8.5	624.197	1.94118
Notosolenus esulcis	Eukaryota	Euglenids	17	10	10	890.12	1.7
Notosolenus navicula	Eukaryota	Euglenids	13	8	8	435.635	1.625
Notosolenus ostium	Eukaryota	Euglenids	32.3	10	10	1691.23	3.23
Notosolenus ostium	Eukaryota	Euglenids	32	17.5	17.5	5131.28	1.82857
Notosolenus scutulum	Eukaryota	Euglenids	15	9	9	636.174	1.66667
Notosolenus similis	Eukaryota	Euglenids	14.5	9	9	614.968	1.61111
Notosolenus tamanduensis	Eukaryota	Euglenids	29	20	20	6073.76	1.45
Notosolenus triangularis	Eukaryota	Euglenids	28	25	25	9163	1.12
Notosolenus urceolatus	Eukaryota	Euglenids	18.5	11.5	11.5	1281.05	1.6087
Peranema fusiforme	Eukaryota	Euglenids	27.5	5.3	5.3	404.468	5.18868
Petalomonas abscissa	Eukaryota	Euglenids	15.5	6.55	6.55	348.188	2.36641
Petalomonas boadicea	Eukaryota	Euglenids	9	7	7	230.908	1.28571
Petalomonas minor	Eukaryota	Euglenids	8	5.5	0.825	19.0067	3.75562
Petalomonas minuta	Eukaryota	Euglenids	7.5	4.8	1.4	26.3894	2.89319
Petalomonas pusilla	Eukaryota	Euglenids	5	2.5	2.5	16.3625	2
Ploeotia adhaerens	Eukaryota	Euglenids	24	19.5	3.7	906.666	2.82549
Ploeotia corrugata	Eukaryota	Euglenids	12.5	5.5	5.5	197.986	2.27273
Ploeotia costata	Eukaryota	Euglenids	19	12.1	12.1	1456.55	1.57025
Ploeotia decipiens	Eukaryota	Euglenids	18	11.5	2.9	314.317	3.11691
Ploeotia heracleum	Eukaryota	Euglenids	14	10	1.5	109.956	3.61478
Ploeotia pseudanisonema	Eukaryota	Euglenids	18.5	10.3	10.3	1027.65	1.79612
Ploeotia punctata	Eukaryota	Euglenids	10	5.05	5.05	133.531	1.9802
Ploeotia tenuis	Eukaryota	Euglenids	18	12	2.5	282.744	3.28634
Pseudoperanema (Peranema) fusiforme	Eukaryota	Euglenids	40	13.6	13.6	3873.8	2.94118
Pseudoperanema (Peranema) trichophorum	Eukaryota	Euglenids	28	5.9	5.9	510.342	4.74576
Pseudoperanema dolichonema	Eukaryota	Euglenids	28	6.5	6.5	619.419	4.30769
Rhabdomonas spiralis	Eukaryota	Euglenids	40	10	10	2094.4	4
Urceolus cristatus	Eukaryota	Euglenids	23	12.5	12.5	1881.69	1.84
Diplonema ambulator	Eukaryota	Euglenozoa	18.5	6.85	6.85	454.519	2.70073
Cyanophora cuspidata	Eukaryota	Glaucophyta	5.5	2.75	2.75	21.7785	2
Developayella elegans	Eukaryota	Gyrista	6	4	4	50.2656	1.5
Hemimastix amphikineta	Eukaryota	Hemimastigophora	17	8.5	8.5	643.112	2
Hemimastix kukwesjijk	Eukaryota	Hemimastigophora	18.3	9.9	9.9	939.12	1.84848
Spironema goodeyi	Eukaryota	Hemimastigophora	35	4	4	293.216	8.75
Spironema multiciliatum	Eukaryota	Hemimastigophora	16	2.5	2.5	52.36	6.4
Spironema terricola	Eukaryota	Hemimastigophora	40	3.5	3.5	256.564	11.4286
Stereonema geiseri	Eukaryota	Hemimastigophora	25	6.5	6.5	553.053	3.84615
Pleurostomum flabellatum	Eukaryota	Heterolobosea	12	2	2	25.1328	6
Pleurostomum flabellatum	Eukaryota	Heterolobosea	12.5	3.5	3.5	80.1762	3.57143
Pleurostomum turgidum	Eukaryota	Heterolobosea	7.5	4.1	4.1	66.0129	1.82927
Stephanopogon minuta	Eukaryota	Heterolobosea	26.5	12.3	12.3	2099.21	2.15447
Bodo cygnus	Eukaryota	Kinetoplastea	10	4.1	4.1	88.0172	2.43902
Bodo designis	Eukaryota	Kinetoplastea	11	3.5	3.5	70.5551	3.14286
Bodo saliens	Eukaryota	Kinetoplastea	8.5	2.25	2.25	22.5312	3.77778
Rhynchobodo simius	Eukaryota	Kinetoplastea	10.5	4	4	87.9648	2.625
Rhynchomonas nasuta	Eukaryota	Kinetoplastea	7	5.25	3	57.7269	1.76383
Bodo platyrhynchus	Eukaryota	Kinetoplastea	5.5	3	3	25.9182	1.83333
Bodo saltans	Eukaryota	Kinetoplastea	6.5	6.5	6.5	143.794	1
Bordnamonas tropicana	Eukaryota	Kinetoplastea	10	3	3	47.124	3.33333
Strigomonas oncopelti	Eukaryota	Kinetoplastea	8.2	2.6	2.6	29.0242	3.15385
Trypanosoma brucei	Eukaryota	Kinetoplastea	25	3.5	3.5	160.352	7.14286
Trypanosoma cruzi	Eukaryota	Kinetoplastea	20	2	2	41.888	10
Carpediemonas membranifera	Eukaryota	Metamonada	8	4	4	67.0208	2
Ergobibamus cyprinoides	Eukaryota	Metamonada	9	5	5	117.81	1.8
Hicanonectes teleskopos	Eukaryota	Metamonada	8.5	5.8	5.8	149.718	1.46552
Iotanema spirale	Eukaryota	Metamonada	11.9	3.5	3.5	76.3278	3.4
Kipferlia bialata	Eukaryota	Metamonada	12.9	6.5	6.5	285.375	1.98462
Dysnectes brevis	Eukaryota	Metamonada	11.75	6.25	6.25	240.324	1.88
Ciliophrys infusionum	Eukaryota	Ochrophyta	5.25	5.25	5.25	75.7666	1
Ochromonas malhamensis	Eukaryota	Ochrophyta	3	3	3	14.1372	1
Cafeteria ligulifera	Eukaryota	Opalozoa	5.5	5.5	5.5	87.1139	1
Cafeteria ligulifera	Eukaryota	Opalozoa	4	4	4	33.5104	1
Cafeteria marsupialis	Eukaryota	Opalozoa	8.5	4.85	4.85	104.689	1.75258
Cafeteria minuta	Eukaryota	Opalozoa	3.75	3.75	3.75	27.6117	1
Cafeteria roenbergensis	Eukaryota	Opalozoa	4.25	3.3	3.3	24.2335	1.28788
Cafeteria roenbergensis	Eukaryota	Opalozoa	4.5	2.8	2.8	18.4726	1.60714
Bicosoeca conica	Eukaryota	Opalozoa	3.75	3.75	3.75	27.6117	1
Caecitellus parvulus	Eukaryota	Opalozoa	4.6	4.6	4.6	50.9651	1
Halocafeteria	Eukaryota	Opalozoa	5	3	3	23.562	1.66667
Pseudobodo tremulans	Eukaryota	Opalozoa	5	5	5	65.45	1
Pseudobodo tremulans	Eukaryota	Opalozoa	4	4	4	33.5104	1
Cthulhu macrofasciculumque	Eukaryota	Parabasalids	20.55	9.05	9.05	881.269	2.27072
Eucomonympha imla	Eukaryota	Parabasalids	135.7	118.3	118.3	994372	1.14708
Holomastigotes lanceolata	Eukaryota	Parabasalids	90	20	20	18849.6	4.5
Hoplonympha natator	Eukaryota	Parabasalids	140	10	10	7330.4	14
Joenopsis intermedia	Eukaryota	Parabasalids	125	90	90	530145	1.38889
Pachyjoenia howa	Eukaryota	Parabasalids	150	75	75	441787	2
Tritrichomonas foetus	Eukaryota	Parabasalids	14.6	6.7	6.7	343.164	2.1791
Psammosa pacifica	Eukaryota	Perkinsidae	7.5	4.5	4.5	79.5217	1.66667
Picomonas judraskeda	Eukaryota	Picozoa	3.15	2.25	2.25	8.34978	1.4
Trimastix convexa	Eukaryota	Preaxostyla	20	8	8	670.208	2.5
Blattamonas junai gen. et sp. nov. Z98GC	Eukaryota	Preaxostyla	5.5	3.8	3.8	41.5843	1.44737
Blattamonas nauphoetae gen. et sp. nov. NAU3	Eukaryota	Preaxostyla	5.3	3.4	3.4	32.0799	1.55882
Blattamonas nauphoetae gen. et sp. nov. Z17NC	Eukaryota	Preaxostyla	5.7	3.6	3.6	38.6794	1.58333
Blattamonas varadinovae gen. et sp. Nov. Z31SE	Eukaryota	Preaxostyla	5.8	3.3	3.3	33.0716	1.75758
Monocercomonoides acer sp. nov. TENE79	Eukaryota	Preaxostyla	5.6	3.8	3.8	42.3404	1.47368
Monocercomonoides communis sp. nov. BAT1	Eukaryota	Preaxostyla	6.7	5	5	87.703	1.34
Monocercomonoides communis sp. nov. Z30BD_1	Eukaryota	Preaxostyla	6.7	3.6	3.6	45.4652	1.86111
Monocercomonoides exilis CAVIA-M	Eukaryota	Preaxostyla	5.4	3.1	3.1	27.1717	1.74194
Monocercomonoides exilis PA203	Eukaryota	Preaxostyla	5.8	3.5	3.5	37.2018	1.65714
Monocercomonoides melolonthae POTCUPRI	Eukaryota	Preaxostyla	7.2	5.7	5.7	122.485	1.26316
Monocercomonoides merkovicensis sp. nov. MAREK 2	Eukaryota	Preaxostyla	6.9	4.9	4.9	86.7443	1.40816
Monocercomonoides merkovicensis sp. nov. VAV1B	Eukaryota	Preaxostyla	6.8	5.4	5.4	103.824	1.25926
Monocercomonoides sp. B1-10	Eukaryota	Preaxostyla	5.7	3.3	3.3	32.5014	1.72727
Monocercomonoides sp. CYRT	Eukaryota	Preaxostyla	5.6	3.5	3.5	35.919	1.6
Monocercomonoides sp. LEI	Eukaryota	Preaxostyla	5.7	3.6	3.6	38.6794	1.58333
Monocercomonoides sp. MURAL 1	Eukaryota	Preaxostyla	5.9	4.5	4.5	62.5571	1.31111
Monocercomonoides sp. OEV	Eukaryota	Preaxostyla	6.6	4.4	4.4	66.9035	1.5
Opisthomitus longiflagellatus	Eukaryota	Preaxostyla	10	3	3	47.124	3.33333
Rhodelphis limneticus	Eukaryota	Rhodophyta	11.5	8	8	385.37	1.4375
Rhodelphis marinus	Eukaryota	Rhodophyta	11	7.75	7.75	345.936	1.41935
Anaeramoeba gargantua sp. nov., strain SIPEK1	Eukaryota	Unclear	32.5	32.5	32.5	17974.2	1
Anaeramoeba ignava sp. nov., strain BMAN	Eukaryota	Unclear	15	15	15	1767.15	1
Ancoracysta twista	Eukaryota	Unclear	10.5	4	4	87.9648	2.625
Idionectes vortex	Eukaryota	Unclear	15	8	8	502.656	1.875
Monas stigmata	Eukaryota	Unclear	6	6	6	113.098	1
Dinematomonas valida	Eukaryota	Unclear (Excavata)	29	13.5	13.5	2767.36	2.14815
Dinematomonas inaequalis	Eukaryota	Unclear (Excavata)	28	11.75	11.75	2024.11	2.38298
Dinematomonas litoralis	Eukaryota	Unclear (Excavata)	56	25	25	18326	2.24
Dinematomonas maculata	Eukaryota	Unclear (Excavata)	31	12	12	2337.35	2.58333
