# Supplementary material for: Flagellar energy costs across the tree of life
Source: eLife. 2022 Jul 26;11:e77266. doi: 10.7554/eLife.77266 (PMC9323006; doi:10.7554/eLife.77266)
Supplement: Figure 1—figure supplement 2—source data 1. [file elife-77266-fig1-figsupp2-data1.xlsx]

## Sheet: Sheet1
For references see Figure 1-source data 1.
		Relative construction cost
Species	Cell volume (µm^3)	Other eukaryotes (Thin)	Thin	Thick
Psammosa pacifica	79.5217		0.0334633	0.0485218
Anaeramoeba ignava sp. nov., strain BMAN	1767.15		0.00235046	0.0212011
Dinematomonas valida	2767.36		0.00527689	0.088124
Anaeramoeba gargantua sp. nov., strain SIPEK1	17974.2		0.000929028	0.0198812
Acavomonas peruviana	385.37	0.0111014
Ancoracysta twista	87.9648	0.0296689
Ancyromonas melba	60.8214	0.0295131
Anisonema acinus	3706.3	0.00759139
Anisonema glaciale	2576.5	0.0123812
Anisonema prosgeobium	2822.2	0.0117074
Anisonema trepidum	372.018	0.0472824
Apocoleps caoi	129951	0.0037566
Auranticordis quadriverberis	87113.9	0.000368464
Bicosoeca conica	27.6117	0.0352709
Blattamonas junai gen. et sp. nov. Z98GC	41.5843	0.138908
Blattamonas nauphoetae gen. et sp. nov. NAU3	32.0799	0.169696
Blattamonas nauphoetae gen. et sp. nov. Z17NC	38.6794	0.14722
Blattamonas varadinovae gen. et sp. Nov. Z31SE	33.0716	0.157443
Bodo cygnus	88.0172	0.0808684
Bodo designis	70.5551	0.120259
Bodo platyrhynchus	25.9182	0.179579
Bodo saliens	22.5312	0.338636
Bodo saltans	143.794	0.0334896
Bordnamonas tropicana	47.124	0.118592
Breviata anathema	92.0391	0.0193596
Caecitellus parvulus	50.9651	0.0441937
Cafeteria ligulifera	87.1139	0.0374374
Cafeteria ligulifera	33.5104	0.0687803
Cafeteria marsupialis	104.689	0.0227815
Cafeteria minuta	27.6117	0.0663922
Cafeteria roenbergensis	24.2335	0.0518044
Cafeteria roenbergensis	18.4726	0.0704731
Carpediemonas membranifera	67.0208	0.0719811
Ceratium fusus	114040	0.00103182
Chilodonella acuta	5647.7	0.063184
Chlamydomonas sp.	1150.35	0.00140354
Chromera velia	11.404	0.239706
Ciliophrys infusionum	75.7666	0.0218219
Codonosiga botrytis	196.35	0.0185669
Colpodella pugnax	169.717	0.0267335
Colpodella unguis	74.8146	0.0339258
Colponema edaphicum	64.141	0.0549614
Colponema globosum	1431.39	0.00387472
Colponema loxodes	1627.28	0.00469451
Colponema marisrubri	162.357	0.0251174
Colponema symmetricum	257.36	0.0310609
Colponema vietnamica	216.394	0.0141366
Cthulhu macrofasciculumque	881.269	0.0894323
Cyanophora cuspidata	21.7785	0.0574598
Developayella elegans	50.2656	0.05709
Dinema validum	7866.11	0.00421076
Dinematomonas inaequalis	2024.11	0.00450723
Dinematomonas litoralis	18326	0.00106748
Dinematomonas maculata	2337.35	0.00347206
Dinophysis acuta	102953	0.000370316
Diplonema ambulator	454.519	0.00383849
Dolium sedentarium	11023.9	0.00108221
Dysnectes brevis	240.324	0.0105052
Ergobibamus cyprinoides	117.81	0.0297124
Eucomonympha imla	994372	0.0656642
Euglena gracilis	5301.45	0.00227739
Euglena viridis	7868.66	0.00248426
Eurystomatella sinica	17504.4	0.0691075
Fusiforma themisticola	10601.5	0.154357
Glissandra innuerende	143.794	0.0272103
Goniomonas amphinema	85.085	0.014973
Goniomonas pacifica	41.888	0.0221575
Halocafeteria	23.562	0.0871134
Helkesimastix marina	29.4525	0.0487214
Hemimastix amphikineta	643.112	0.0399439
Hemimastix kukwesjijk	939.12	0.0292936
Heteronema exaratum	1548.55	0.00584426
Heteronema globuliferum	348.718	0.0496348
Heteronema splendens	23562	0.00197674
Heteronema vittatum	3534.3	0.00674957
Hicanonectes teleskopos	149.718	0.0291038
Holomastigotes lanceolata	18849.6	0.0660038
Hoplonympha natator	7330.4	0.0374205
Idionectes vortex	502.656	0.00895216
Iotanema spirale	76.3278	0.0464277
Joenopsis intermedia	530145	0.0377693
Kipferlia bialata	285.375	0.0139955
Kovalevaia sulcata	407989	0.0018822
Mastigamoeba psammobia	239.563	0.0183706
Mastigella simplex	121.88	0.0172005
Menoidium cultellus	1154.54	0.00466199
Metanophrys orientalis	5026.56	0.078338
Monas stigmata	113.098	0.0190231
Monocercomonoides acer sp. nov. TENE79	42.3404	0.169667
Monocercomonoides communis sp. nov. BAT1	87.703	0.0906168
Monocercomonoides communis sp. nov. Z30BD_1	45.4652	0.168064
Monocercomonoides exilis CAVIA-M	27.1717	0.199776
Monocercomonoides exilis PA203	37.2018	0.163144
Monocercomonoides melolonthae POTCUPRI	122.485	0.0625057
Monocercomonoides merkovicensis sp. nov. MAREK 2	86.7443	0.117971
Monocercomonoides merkovicensis sp. nov. VAV1B	103.824	0.089222
Monocercomonoides sp. B1-10	32.5014	0.184565
Monocercomonoides sp. CYRT	35.919	0.215411
Monocercomonoides sp. LEI	38.6794	0.168166
Monocercomonoides sp. MURAL 1	62.5571	0.110557
Monocercomonoides sp. OEV	66.9035	0.120993
Nolandia sinica	38484.6	0.0096628
Notosolenus alatellus	551.351	0.0103666
Notosolenus apocamptus	88.0172	0.0741294
Notosolenus apocamptus	216.77	0.0355911
Notosolenus canellatus	624.197	0.0166284
Notosolenus esulcis	890.12	0.00857125
Notosolenus navicula	435.635	0.0222845
Notosolenus ostium	1691.23	0.0114972
Notosolenus ostium	5131.28	0.00261179
Notosolenus scutulum	636.174	0.0138512
Notosolenus similis	614.968	0.0119626
Notosolenus tamanduensis	6073.76	0.00172981
Notosolenus triangularis	9163	0.00151803
Notosolenus urceolatus	1281.05	0.00682381
Ochromonas malhamensis	14.1372	0.183492
Opalina ranarum	2.29881e+06	0.105378
Opisthomitus longiflagellatus	47.124	0.444719
Pachyjoenia howa	441787	0.024341
Palustrimonas yorkeensis	180.621	0.0244955
Parafurgasonia zhangi	9081.19	0.017655
Paramecium caudatum	291943	0.0879451
Paramecium tetraurelia	233735	0.028291
Peranema fusiforme	404.468	0.0217991
Peranema trichophorum	4146.91	0.00513789
Peranema trichophorum	13987.5	0.00156009
Petalomonas abscissa	348.188	0.0186405
Petalomonas boadicea	230.908	0.0105768
Petalomonas marginalis	679.044	0.00965874
Petalomonas minor	19.0067	0.095376
Petalomonas minuta	26.3894	0.0650372
Petalomonas pusilla	16.3625	0.103399
Picomonas judraskeda	8.34978	0.278005
Pleurostomum flabellatum	25.1328	0.195476
Pleurostomum flabellatum	80.1762	0.0391002
Pleurostomum turgidum	66.0129	0.0837368
Ploeotia adhaerens	906.666	0.0162777
Ploeotia azurina	346.361	0.0360442
Ploeotia corrugata	197.986	0.0540262
Ploeotia costata	1456.55	0.0111636
Ploeotia decipiens	314.317	0.0423482
Ploeotia heracleum	109.956	0.0912336
Ploeotia longifilum	1013.69	0.0230452
Ploeotia oblonga	1960.36	0.0115569
Ploeotia pseudanisonema	1027.65	0.0207532
Ploeotia punctata	133.531	0.0908583
Ploeotia tenuis	282.744	0.0469278
Ploeotia vitrea	1763.19	0.0101585
Polytoma uvella	1393.82	0.00721226
Polytomella agilis	123.202	0.0330703
Pseudobodo tremulans	65.45	0.0314386
Pseudobodo tremulans	33.5104	0.0687803
Pseudoperanema (Peranema) fusiforme	3873.8	0.00830195
Pseudoperanema (Peranema) trichophorum	510.342	0.0240137
Pseudoperanema dolichonema	619.419	0.0304596
Pyramimonas octopus	731.175	0.0235124
Rhabdomonas spiralis	2094.4	0.00336375
Rhodelphis limneticus	385.37	0.00925113
Rhodelphis marinus	345.936	0.0121482
Rhynchobodo simius	87.9648	0.0937267
Rhynchomonas nasuta	57.7269	0.0649338
Spironema goodeyi	293.216	0.0503347
Spironema multiciliatum	52.36	0.105955
Spironema terricola	256.564	0.0763938
Stephanopogon minuta	2099.21	0.0891029
Stereonema geiseri	553.053	0.0598382
Strigomonas oncopelti	29.0242	0.134419
Tetrahymena thermophila	12365.3	0.0459031
Tiarina fusa	28634.4	0.0152647
Trachelocerca ditis	321050	0.00737378
Tracheloraphis dragescoi	486913	0.0310783
Trimastix convexa	670.208	0.0169308
Tritrichomonas foetus	343.164	0.0237305
Trypanosoma brucei	160.352	0.0451945
Trypanosoma cruzi	41.888	0.0686883
Urceolus cornutus	3534.3	0.00224986
Urceolus cristatus	1881.69	0.00573621
Uronemella sinensis	4810.57	0.0588081
