# Supplementary material for: Flagellar energy costs across the tree of life
Source: eLife. 2022 Jul 26;11:e77266. doi: 10.7554/eLife.77266 (PMC9323006; doi:10.7554/eLife.77266)
Supplement: Figure 1—source data 1. [file elife-77266-fig1-data1.xlsx]

## Sheet: Sheet1
Bacteria
Cost per µm flagellum (ATP):	30241548		Cost per µm sheathed flagellum (ATP):	149732748
Species	Domain	Phylum	Sheath (Y/N)	Cell length (µm)	Cell width (µm)	Cell volume (µm^3)	Flagellum number	Flagellum length (µm)	Total flagellar length (µm)	Absolute construction cost (ATP)	Cell construction cost (ATP)	Relative construction cost	References
Bacillus alcalophilus	Bacteria	Firmicutes	N	4	0.6	1.07443	3	6.7	20.1	6.07855e+08	2.88614e+10	0.0210612	(Boone et al., 2001; Terahara et al., 2012)
Bacillus clausii	Bacteria	Firmicutes	N	3	0.6	0.791683	12	6	72	2177391456	2.1462e+10	0.101453	(Boone et al., 2001; Terahara et al., 2008)
Bacillus halodurans	Bacteria	Firmicutes	N	3.5	0.55	0.787985	21	10.8	226.8	6.85878e+09	2.13647e+10	0.321033	(Aono et al., 1992; Boone et al., 2001; Ito & Takahashi, 2017)
Bacillus megaterium	Bacteria	Firmicutes	N	3	1.5	4.41787	36	17.7	637.2	1.92699e+10	1.13745e+11	0.169413	(Brennen & Winet, 1977)
Bacillus pseudofirmus	Bacteria	Firmicutes	N	4.5	0.7	1.64201	1	6.2	6.2	1.87498e+08	4.35501e+10	0.00430533	(Boone et al., 2001; Fujinami et al., 2007)
Bdellovibrio bacteriovorus	Bacteria	Proteobacteria	Y	1.4	0.25	0.0646319	1	3.4	3.4	5.09091e+08	1.8889e+09	0.269518	(Brennen & Winet, 1977; McCarter, 2004; Thomashow & Rittenberg, 1985)
Borrelia burgdorferi	Bacteria	Spirochaetes	N	15	0.33	1.27354	18	13.5	243	7348696164	3.4036e+10	0.21591	(Charon et al., 2012; Goldstein et al., 1996; Kudryashev et al., 2009)
Caulobacter crescentus	Bacteria	Alpha-proteobacteria	N	1.92	0.84	0.908852	1	6.1	6.1	1.84473e+08	2.45366e+10	0.00751831	(Briegel et al., 2009; Brun et al., 1994; Chattopadhyay & Wu, 2009; Driks et al., 1989; McCarter, 2004)
Clostridium tetani	Bacteria	Firmicutes	N	6	0.5	1.14538	15	9.4	141	4264058268	3.07082e+10	0.138857	(Brennen & Winet, 1977)
Cristispira balbiannii	Bacteria	Spirochaetes	N	80	2	249.234	100	21	2100	63507250800	5.68569e+12	0.0111697	(Brennen & Winet, 1977)
Escherichia coli	Bacteria	Gamma-proteobacteria	N	1.7	0.7	0.564441	2.8	6.8	19.04	5.75799e+08	1.54577e+10	0.03725	(Guadayol et al., 2017)
Escherichia coli	Bacteria	Gamma-proteobacteria	N	3	1.5	4.41787	6	9.3	55.8	1.68748e+09	1.13745e+11	0.0148356	(Brennen & Winet, 1977)
Leptospira interrogans	Bacteria	Spirochaetes	N	11.5	0.14	0.176311	2	4.2	8.4	2.54029e+08	4.99995e+09	0.0508063	(Malmström et al., 2009; Wolgemuth et al., 2006)
Photobacterium phosphoreum	Bacteria	Gamma-proteobacteria	N	1.2	1.2	0.904781	1	6	6	181449288	2.44299e+10	0.00742734	(Brennen & Winet, 1977)
Proteus mirabilis	Bacteria	Gamma-proteobacteria	N	1.35	0.65	0.376076	2	8.125	16.25	491425155	1.04254e+10	0.0471374	(Hoeniger, 1965; Jones et al., 2004)
Proteus mirabilis	Bacteria	Gamma-proteobacteria	N	48	0.7	18.3828	2750	5.25	14437.5	436612349250	4.53476e+11	0.962812	(Hoeniger, 1965)
Pseudomonas aeruginosa	Bacteria	Gamma-proteobacteria	N	1.5	0.5	0.2618	1	4	4	120966192	7.33678e+09	0.0164876	(Brennen & Winet, 1977; Tsuda & Iino, 1983)
Salmonella typhimurium	Bacteria	Gamma-proteobacteria	N	1.4	0.73	0.484111	4.9	5.7	27.93	8.44646e+08	1.3319e+10	0.0634167	(Magariyama et al., 2001)
Salmonella typhosa	Bacteria	Gamma-proteobacteria	N	2.5	0.65	0.757682	6	11.4	68.4	2.06852e+09	2.05673e+10	0.100573	(Brennen & Winet, 1977)
Sarcina ureae	Bacteria	Firmicutes	N	2	2	4.1888	1	16	16	483864768	1.08019e+11	0.00447942	(Brennen & Winet, 1977)
Selenomonas ruminantium	Bacteria	Firmicutes	N	11	3	70.686	35	10	350	10584541800	1.67467e+12	0.00632039	(Chalcroft et al., 1973)
Serratia marcescens	Bacteria	Gamma-proteobacteria	N	1	0.5	0.163625	4	3.6	14.4	4.35478e+08	4.6506e+09	0.0936391	(Brennen & Winet, 1977)
Spirillum serpens	Bacteria	Beta-proteobacteria	N	3	1	2.0944	14	4.8	67.2	2.03223e+09	5.51446e+10	0.0368528	(Brennen & Winet, 1977)
Spirillum volutans	Bacteria	Beta-proteobacteria	N	19.25	1.47	31.8389	150	10.13	1519.5	4.5952e+10	7.72582e+11	0.0594785	(Brennen & Winet, 1977; Krieg, 1976; Ramia & Swan, 1994)
Spirochaeta litoralis	Bacteria	Spirochaetes	N	13	0.45	2.04371	3	15.6	46.8	1.4153e+09	5.38495e+10	0.0262826	(Brennen & Winet, 1977)
Treponema denticola	Bacteria	Spirochaetes	N	11	0.23	0.453839	4	6	24	725797152	1.25104e+10	0.0580157	(Charon et al., 1992; Izard et al., 2008; Slivienski-Gebhardt et al., 2004; Wolgemuth et al., 2006)
Treponema primitia	Bacteria	Spirochaetes	N	5.5	0.375	0.593652	2	5	10	302415480	1.62331e+10	0.0186296	(Briegel et al., 2009; Murphy et al., 2008)
Vibrio alginolyticus	Bacteria	Gamma-proteobacteria	Y	3.26	0.75	1.32978	1	4.81	4.81	7.20215e+08	3.54929e+10	0.0202918	(Chattopadhyay & Wu, 2009; Magariyama et al., 1995)
Vibrio cholera	Bacteria	Gamma-proteobacteria	Y	3	0.45	0.453274	1	2.6	2.6	3.89305e+08	1.24953e+10	0.0311562	(Brennen & Winet, 1977; Briegel et al., 2009)
Eukaryotes
* Because of its ciliated nature Opalina ranarum is grouped with ciliates here, but in reality it belongs to a different phylum.
Cost per µm flagellum (ATP):	2.79211e+09	Cost per µm flagellum for euglenozoa and dinoflagellates (ATP):	5.58423e+09
Species	Domain	Phylum	Cell length (µm)	Cell width (µm)	Cell depth (µm)	Cell volume (µm^3)	Total flagellar length (µm)	Total flagellar cost (ATP)	Cell cost (ATP)	Relative cost	References
Acavomonas peruviana	Eukaryota	Colponemida	11.5	8	8	385.37	34.5	9.63279e+10	8.67713e+12	0.0111014	(Tikhonenkov et al., 2014)
Anaeramoeba gargantua sp. nov., strain SIPEK1	Eukaryota	Unclear	32.5	32.5	32.5	17974.2	120	3.35054e+11	3.60649e+14	0.000929028	(Taborsky et al., 2017)
Anaeramoeba ignava sp. nov., strain BMAN	Eukaryota	Unclear	15	15	15	1767.15	32	8.93476e+10	3.80128e+13	0.00235046	(Taborsky et al., 2017)
Ancoracysta twista	Eukaryota	Unclear	10.5	4	4	87.9648	22	6.14265e+10	2.0704e+12	0.0296689	(Janouskovec et al., 2017)
Ancyromonas melba	Eukaryota	Ancyromonadida	6	4.4	4.4	60.8214	15.3	4.27193e+10	1.44747e+12	0.0295131	(Patterson & Simpson, 1996)
Anisonema acinus	Eukaryota	Euglenids	26	16.5	16.5	3706.3	106	5.91928e+11	7.79736e+13	0.00759139	(Larsen & Patterson, 1990)
Anisonema glaciale	Eukaryota	Euglenids	27	13.5	13.5	2576.5	121.5	6.78484e+11	5.47993e+13	0.0123812	(Larsen & Patterson, 1990)
Anisonema prosgeobium	Eukaryota	Euglenids	27.5	14	14	2822.2	125.5	7.0082e+11	5.98613e+13	0.0117074	(Larsen & Patterson, 1990)
Anisonema trepidum	Eukaryota	Euglenids	14.5	7	7	372.018	71	3.9648e+11	8.38536e+12	0.0472824	(Larsen & Patterson, 1990)
Apocoleps caoi	Eukaryota	Ciliates	110	47.5	47.5	129951	3306	9.23073e+12	2.4572e+15	0.0037566	(Chen et al., 2012)
Auranticordis quadriverberis	Eukaryota	Cercozoa	55	55	55	87113.9	220	6.14265e+11	1.66709e+15	0.000368464	(Chantangsi et al., 2008)
Bicosoeca conica	Eukaryota	Opalozoa	3.75	3.75	3.75	27.6117	8.5	2.3733e+10	6.72877e+11	0.0352709	(Larsen & Patterson, 1990)
Blattamonas junai gen. et sp. nov. Z98GC	Eukaryota	Preaxostyla	5.5	3.8	3.8	41.5843	49.8	1.39047e+11	1.00101e+12	0.138908	(Treitli et al., 2018)
Blattamonas nauphoetae gen. et sp. nov. NAU3	Eukaryota	Preaxostyla	5.3	3.4	3.4	32.0799	47.3	1.32067e+11	7.78254e+11	0.169696	(Treitli et al., 2018)
Blattamonas nauphoetae gen. et sp. nov. Z17NC	Eukaryota	Preaxostyla	5.7	3.6	3.6	38.6794	49.2	1.37372e+11	9.33104e+11	0.14722	(Treitli et al., 2018)
Blattamonas varadinovae gen. et sp. Nov. Z31SE	Eukaryota	Preaxostyla	5.8	3.3	3.3	33.0716	45.2	1.26204e+11	8.0158e+11	0.157443	(Treitli et al., 2018)
Bodo cygnus	Eukaryota	Kinetoplastea	10	4.1	4.1	88.0172	30	1.67527e+11	2.0716e+12	0.0808684	(Patterson & Simpson, 1996)
Bodo designis	Eukaryota	Kinetoplastea	11	3.5	3.5	70.5551	36	2.01032e+11	1.67166e+12	0.120259	(Larsen & Patterson, 1990; Lisicki et al., 2019; Patterson & Simpson, 1996)
Bodo platyrhynchus	Eukaryota	Kinetoplastea	5.5	3	3	25.9182	20.35	1.13639e+11	6.32808e+11	0.179579	(Larsen & Patterson, 1990)
Bodo saliens	Eukaryota	Kinetoplastea	8.5	2.25	2.25	22.5312	33.5	1.87072e+11	5.52427e+11	0.338636	(Larsen & Patterson, 1990; Patterson & Simpson, 1996)
Bodo saltans	Eukaryota	Kinetoplastea	6.5	6.5	6.5	143.794	20	1.11685e+11	3.3349e+12	0.0334896	(Patterson & Simpson, 1996)
Bordnamonas tropicana	Eukaryota	Kinetoplastea	10	3	3	47.124	24	1.34021e+11	1.13011e+12	0.118592	(Patterson & Simpson, 1996)
Breviata anathema	Eukaryota	Amorphea	12.5	3.75	3.75	92.0391	15	4.18817e+10	2.16336e+12	0.0193596	(Heiss et al., 2013)
Caecitellus parvulus	Eukaryota	Opalozoa	4.6	4.6	4.6	50.9651	19.3	5.38878e+10	1.21935e+12	0.0441937	(Patterson & Simpson, 1996)
Cafeteria ligulifera	Eukaryota	Opalozoa	5.5	5.5	5.5	87.1139	27.5	7.67831e+10	2.05097e+12	0.0374374	(Patterson & Simpson, 1996)
Cafeteria ligulifera	Eukaryota	Opalozoa	4	4	4	33.5104	20	5.58423e+10	8.11894e+11	0.0687803	(Larsen & Patterson, 1990)
Cafeteria marsupialis	Eukaryota	Opalozoa	8.5	4.85	4.85	104.689	20	5.58423e+10	2.45121e+12	0.0227815	(Larsen & Patterson, 1990)
Cafeteria minuta	Eukaryota	Opalozoa	3.75	3.75	3.75	27.6117	16	4.46738e+10	6.72877e+11	0.0663922	(Larsen & Patterson, 1990)
Cafeteria roenbergensis	Eukaryota	Opalozoa	4.25	3.3	3.3	24.2335	11	3.07132e+10	5.92869e+11	0.0518044	(Patterson & Simpson, 1996)
Cafeteria roenbergensis	Eukaryota	Opalozoa	4.5	2.8	2.8	18.4726	11.5	3.21093e+10	4.55625e+11	0.0704731	(Larsen & Patterson, 1990)
Carpediemonas membranifera	Eukaryota	Metamonada	8	4	4	67.0208	41	1.14477e+11	1.59037e+12	0.0719811	(Simpson & Patterson, 1999)
Ceratium fusus	Eukaryota	Dinoflagellata	450	22	22	114040	400	2.23369e+12	2.16482e+15	0.00103182	(Brennen & Winet, 1977; Lisicki et al., 2019)
Chilodonella acuta	Eukaryota	Ciliates	39	22	12.5714	5647.7	2655	7.41306e+12	1.17325e+14	0.063184	(Fan et al., 2014)
Chlamydomonas sp.	Eukaryota	Chlorophyta	13	13	13	1150.35	12.6	3.51806e+10	2.50657e+13	0.00140354	(Brennen & Winet, 1977; Lisicki et al., 2019)
Chromera velia	Eukaryota	Colpodellida	4.5	2.2	2.2	11.404	24.5	6.84068e+10	2.85378e+11	0.239706	(Weatherby et al., 2011)
Ciliophrys infusionum	Eukaryota	Ochrophyta	5.25	5.25	5.25	75.7666	14	3.90896e+10	1.7913e+12	0.0218219	(Larsen & Patterson, 1990; Patterson & Simpson, 1996)
Codonosiga botrytis	Eukaryota	Choanoflagellata	15	5	5	196.35	30	8.37634e+10	4.51144e+12	0.0185669	(Brennen & Winet, 1977)
Colpodella pugnax	Eukaryota	Colpodellida	13.5	4.9	4.9	169.717	37.5	1.04704e+11	3.9166e+12	0.0267335	(Patterson & Simpson, 1996)
Colpodella unguis	Eukaryota	Colpodellida	8.5	4.1	4.1	74.8146	21.5	6.00304e+10	1.76946e+12	0.0339258	(Patterson & Simpson, 1996)
Colponema edaphicum	Eukaryota	Colponemida	10	3.5	3.5	64.141	30	8.37634e+10	1.52404e+12	0.0549614	(Tikhonenkov et al., 2014)
Colponema globosum	Eukaryota	Colponemida	15	13.5	13.5	1431.39	43	1.20061e+11	3.09857e+13	0.00387472	(Tikhonenkov et al., 2014)
Colponema loxodes	Eukaryota	Colponemida	23.5	11.5	11.5	1627.28	59	1.64735e+11	3.50909e+13	0.00469451	(Tikhonenkov et al., 2014)
Colponema marisrubri	Eukaryota	Colponemida	11.25	5.25	5.25	162.357	33.75	9.42338e+10	3.75173e+12	0.0251174	(Tikhonenkov et al., 2014)
Colponema symmetricum	Eukaryota	Colponemida	12	6.4	6.4	257.36	65.25	1.82185e+11	5.86543e+12	0.0310609	(Tikhonenkov et al., 2014)
Colponema vietnamica	Eukaryota	Colponemida	12.5	5.75	5.75	216.394	25.1	7.0082e+10	4.9575e+12	0.0141366	(Tikhonenkov et al., 2014)
Cthulhu macrofasciculumque	Eukaryota	Parabasalids	20.55	9.05	9.05	881.269	620	1.73111e+12	1.93567e+13	0.0894323	(James et al., 2013)
Cyanophora cuspidata	Eukaryota	Glaucophyta	5.5	2.75	2.75	21.7785	11	3.07132e+10	5.34518e+11	0.0574598	(Heiss et al., 2017)
Developayella elegans	Eukaryota	Gyrista	6	4	4	50.2656	24.6	6.8686e+10	1.20312e+12	0.05709	(Tong, 1995)
Dinema validum	Eukaryota	Euglenids	32.5	21.5	21.5	7866.11	122	6.81276e+11	1.61794e+14	0.00421076	(Patterson & Simpson, 1996)
Dinematomonas inaequalis	Eukaryota	Unclear (Excavata)	28	11.75	11.75	2024.11	70	1.95448e+11	4.33632e+13	0.00450723	(Larsen & Patterson, 1990)
Dinematomonas litoralis	Eukaryota	Unclear (Excavata)	56	25	25	18326	140.5	3.92292e+11	3.67494e+14	0.00106748	(Larsen & Patterson, 1990)
Dinematomonas maculata	Eukaryota	Unclear (Excavata)	31	12	12	2337.35	62	1.73111e+11	4.98583e+13	0.00347206	(Larsen & Patterson, 1990)
Dinematomonas valida	Eukaryota	Unclear (Excavata)	29	13.5	13.5	2767.36	111	3.09925e+11	5.87325e+13	0.00527689	(Larsen & Patterson, 1990)
Dinophysis acuta	Eukaryota	Dinoflagellata	65	55	55	102953	130	7.25949e+11	1.96035e+15	0.000370316	(Brennen & Winet, 1977)
Diplonema ambulator	Eukaryota	Euglenozoa	18.5	6.85	6.85	454.519	7	3.90896e+10	1.01836e+13	0.00383849	(Larsen & Patterson, 1990)
Dolium sedentarium	Eukaryota	Euglenids	43.5	22	22	11023.9	43.5	2.42914e+11	2.2446e+14	0.00108221	(Larsen & Patterson, 1990)
Dysnectes brevis	Eukaryota	Metamonada	11.75	6.25	6.25	240.324	20.65	5.76571e+10	5.48844e+12	0.0105052	(Yubuki et al., 2007)
Ergobibamus cyprinoides	Eukaryota	Metamonada	9	5	5	117.81	29.25	8.16693e+10	2.74866e+12	0.0297124	(Park et al., 2010)
Eucomonympha imla	Eukaryota	Parabasalids	135.7	118.3	118.3	994372	416000	1.16152e+15	1.76888e+16	0.0656642	(Carpenter & Keeling, 2007)
Euglena gracilis	Eukaryota	Euglenids	45	15	15	5301.45	45	2.5129e+11	1.10341e+14	0.00227739	(Brennen & Winet, 1977; Hyams, 1982; Lisicki et al., 2019)
Euglena viridis	Eukaryota	Euglenids	52	17	17	7868.66	72	4.02064e+11	1.61845e+14	0.00248426	(Brennen & Winet, 1977; Lisicki et al., 2019)
Eurystomatella sinica	Eukaryota	Ciliates	57.5	34.1	17.05	17504.4	8700	2.42914e+13	3.51501e+14	0.0691075	(Miao et al., 2010)
Fusiforma themisticola	Eukaryota	Ciliates	72.6	16.7	16.7	10601.5	11947.5	3.33588e+13	2.16114e+14	0.154357	(Chantangsi et al., 2013)
Glissandra innuerende	Eukaryota	CRuMs	6.5	6.5	6.5	143.794	32.5	9.07437e+10	3.3349e+12	0.0272103	(Patterson & Simpson, 1996)
Goniomonas amphinema	Eukaryota	Cryptista	6.5	5	5	85.085	10.75	3.00152e+10	2.00462e+12	0.014973	(Larsen & Patterson, 1990)
Goniomonas pacifica	Eukaryota	Cryptista	5	4	4	41.888	8	2.23369e+10	1.0081e+12	0.0221575	(Patterson & Simpson, 1996)
Halocafeteria	Eukaryota	Opalozoa	5	3	3	23.562	18	5.0258e+10	5.76927e+11	0.0871134	(Park & Simpson, 2015)
Helkesimastix marina	Eukaryota	Cercozoa	6.25	3	3	29.4525	12.5	3.49014e+10	7.16347e+11	0.0487214	(Cavalier-Smith et al., 2009)
Hemimastix amphikineta	Eukaryota	Hemimastigophora	17	8.5	8.5	643.112	204	5.69591e+11	1.42598e+13	0.0399439	(Foissner & Foissner, 1993; Lax et al., 2018)
Hemimastix kukwesjijk	Eukaryota	Hemimastigophora	18.3	9.9	9.9	939.12	216	6.03097e+11	2.0588e+13	0.0292936	(Lax et al., 2018)
Heteronema exaratum	Eukaryota	Euglenids	17.5	13	13	1548.55	35	1.95448e+11	3.34427e+13	0.00584426	(Larsen & Patterson, 1990)
Heteronema globuliferum	Eukaryota	Euglenids	18.5	6	6	348.718	70	3.90896e+11	7.87544e+12	0.0496348	(Larsen & Patterson, 1990)
Heteronema splendens	Eukaryota	Euglenids	200	15	15	23562	166	9.26982e+11	4.68944e+14	0.00197674	(Larsen & Patterson, 1990)
Heteronema vittatum	Eukaryota	Euglenids	30	15	15	3534.3	90	5.0258e+11	7.44611e+13	0.00674957	(Larsen & Patterson, 1990)
Hicanonectes teleskopos	Eukaryota	Metamonada	8.5	5.8	5.8	149.718	36.15	1.00935e+11	3.4681e+12	0.0291038	(Park et al., 2009)
Holomastigotes lanceolata	Eukaryota	Parabasalids	90	20	20	18849.6	8928	2.4928e+13	3.77675e+14	0.0660038	(Brugerolle & Bordereau, 2004)
Hoplonympha natator	Eukaryota	Parabasalids	140	10	10	7330.4	2025	5.65403e+12	1.51095e+14	0.0374205	(Brugerolle & Bordereau, 2004)
Idionectes vortex	Eukaryota	Unclear	15	8	8	502.656	36	1.00516e+11	1.12281e+13	0.00895216	(Hess et al., 2019)
Iotanema spirale	Eukaryota	Metamonada	11.9	3.5	3.5	76.3278	30	8.37634e+10	1.80417e+12	0.0464277	(Yubuki et al., 2017)
Joenopsis intermedia	Eukaryota	Parabasalids	125	90	90	530145	130000	3.62975e+14	9610320804990644	0.0377693	(Brugerolle & Bordereau, 2003)
Kipferlia bialata	Eukaryota	Metamonada	12.9	6.5	6.5	285.375	32.5	9.07437e+10	6.48379e+12	0.0139955	(Yubuki et al., 2013)
Kovalevaia sulcata	Eukaryota	Ciliates	487	40	40	407989	5025	1.40304e+13	7454253876593500	0.0018822	(Yan et al., 2013)
Mastigamoeba psammobia	Eukaryota	Amorphea	12.5	6.05	6.05	239.563	36	1.00516e+11	5.47158e+12	0.0183706	(Larsen & Patterson, 1990)
Mastigella simplex	Eukaryota	Amorphea	9.5	4.95	4.95	121.88	17.5	4.8862e+10	2.84073e+12	0.0172005	(Larsen & Patterson, 1990)
Menoidium cultellus	Eukaryota	Euglenids	45	7	7	1154.54	21	1.17269e+11	2.51542e+13	0.00466199	(Brennen & Winet, 1977)
Metanophrys orientalis	Eukaryota	Ciliates	37.5	16	16	5026.56	2940	8.20881e+12	1.04787e+14	0.078338	(Pan et al., 2013)
Monas stigmata	Eukaryota	Unclear	6	6	6	113.098	18	5.0258e+10	2.64195e+12	0.0190231	(Brennen & Winet, 1977; Lisicki et al., 2019)
Monocercomonoides acer sp. nov. TENE79	Eukaryota	Preaxostyla	5.6	3.8	3.8	42.3404	61.9	1.72832e+11	1.01866e+12	0.169667	(Treitli et al., 2018)
Monocercomonoides communis sp. nov. BAT1	Eukaryota	Preaxostyla	6.7	5	5	87.703	67	1.87072e+11	2.06442e+12	0.0906168	(Treitli et al., 2018)
Monocercomonoides communis sp. nov. Z30BD_1	Eukaryota	Preaxostyla	6.7	3.6	3.6	45.4652	65.7	1.83442e+11	1.0915e+12	0.168064	(Treitli et al., 2018)
Monocercomonoides exilis CAVIA-M	Eukaryota	Preaxostyla	5.4	3.1	3.1	27.1717	47.4	1.32346e+11	6.62473e+11	0.199776	(Treitli et al., 2018)
Monocercomonoides exilis PA203	Eukaryota	Preaxostyla	5.8	3.5	3.5	37.2018	52.5	1.46586e+11	8.98508e+11	0.163144	(Treitli et al., 2018)
Monocercomonoides melolonthae POTCUPRI	Eukaryota	Preaxostyla	7.2	5.7	5.7	122.485	63.9	1.78416e+11	2.8544e+12	0.0625057	(Treitli et al., 2018)
Monocercomonoides merkovicensis sp. nov. MAREK 2	Eukaryota	Preaxostyla	6.9	4.9	4.9	86.7443	86.3	2.40959e+11	2.04253e+12	0.117971	(Treitli et al., 2018)
Monocercomonoides merkovicensis sp. nov. VAV1B	Eukaryota	Preaxostyla	6.8	5.4	5.4	103.824	77.7	2.16947e+11	2.43154e+12	0.089222	(Treitli et al., 2018)
Monocercomonoides sp. B1-10	Eukaryota	Preaxostyla	5.7	3.3	3.3	32.5014	52.1	1.45469e+11	7.88171e+11	0.184565	(Treitli et al., 2018)
Monocercomonoides sp. CYRT	Eukaryota	Preaxostyla	5.6	3.5	3.5	35.919	67	1.87072e+11	8.68439e+11	0.215411	(Treitli et al., 2018)
Monocercomonoides sp. LEI	Eukaryota	Preaxostyla	5.7	3.6	3.6	38.6794	56.2	1.56917e+11	9.33104e+11	0.168166	(Treitli et al., 2018)
Monocercomonoides sp. MURAL 1	Eukaryota	Preaxostyla	5.9	4.5	4.5	62.5571	58.9	1.64455e+11	1.48752e+12	0.110557	(Treitli et al., 2018)
Monocercomonoides sp. OEV	Eukaryota	Preaxostyla	6.6	4.4	4.4	66.9035	68.8	1.92097e+11	1.58767e+12	0.120993	(Treitli et al., 2018)
Nolandia sinica	Eukaryota	Ciliates	60	35	35	38484.6	2612	7.293e+12	7.54751e+14	0.0096628	(Chen et al., 2012)
Notosolenus alatellus	Eukaryota	Euglenids	13	9	9	551.351	22.8	1.2732e+11	1.22817e+13	0.0103666	(Larsen & Patterson, 1990)
Notosolenus apocamptus	Eukaryota	Euglenids	10	4.1	4.1	88.0172	27.5	1.53566e+11	2.0716e+12	0.0741294	(Patterson & Simpson, 1996)
Notosolenus apocamptus	Eukaryota	Euglenids	11.5	6	6	216.77	31.65	1.76741e+11	4.96587e+12	0.0355911	(Larsen & Patterson, 1990)
Notosolenus canellatus	Eukaryota	Euglenids	16.5	8.5	8.5	624.197	41.25	2.30349e+11	1.38528e+13	0.0166284	(Patterson & Simpson, 1996)
Notosolenus esulcis	Eukaryota	Euglenids	17	10	10	890.12	30	1.67527e+11	1.95452e+13	0.00857125	(Larsen & Patterson, 1990)
Notosolenus navicula	Eukaryota	Euglenids	13	8	8	435.635	39	2.17785e+11	9.77292e+12	0.0222845	(Larsen & Patterson, 1990)
Notosolenus ostium	Eukaryota	Euglenids	32.3	10	10	1691.23	75	4.18817e+11	3.64276e+13	0.0114972	(Patterson & Simpson, 1996)
Notosolenus ostium	Eukaryota	Euglenids	32	17.5	17.5	5131.28	50	2.79211e+11	1.06904e+14	0.00261179	(Larsen & Patterson, 1990)
Notosolenus scutulum	Eukaryota	Euglenids	15	9	9	636.174	35	1.95448e+11	1.41105e+13	0.0138512	(Larsen & Patterson, 1990)
Notosolenus similis	Eukaryota	Euglenids	14.5	9	9	614.968	29.25	1.63339e+11	1.36541e+13	0.0119626	(Larsen & Patterson, 1990)
Notosolenus tamanduensis	Eukaryota	Euglenids	29	20	20	6073.76	39	2.17785e+11	1.25901e+14	0.00172981	(Larsen & Patterson, 1990)
Notosolenus triangularis	Eukaryota	Euglenids	28	25	25	9163	51	2.84796e+11	1.87608e+14	0.00151803	(Larsen & Patterson, 1990)
Notosolenus urceolatus	Eukaryota	Euglenids	18.5	11.5	11.5	1281.05	34	1.89864e+11	2.78237e+13	0.00682381	(Larsen & Patterson, 1990)
Ochromonas malhamensis	Eukaryota	Ochrophyta	3	3	3	14.1372	23.1	6.44978e+10	3.51502e+11	0.183492	(Brennen & Winet, 1977; Lisicki et al., 2019)
Opalina ranarum	Eukaryota	Ciliates*	350	112	112	2.29881e+06	1505055	4202284294341074	3.9878e+16	0.105378	(Brennen & Winet, 1977)
Opisthomitus longiflagellatus	Eukaryota	Preaxostyla	10	3	3	47.124	180	5.0258e+11	1.13011e+12	0.444719	(Radek et al., 2014)
Pachyjoenia howa	Eukaryota	Parabasalids	150	75	75	441787	70200	1.96006e+14	8052524902594817	0.024341	(Brugerolle & Bordereau, 2005)
Palustrimonas yorkeensis	Eukaryota	Colponemida	11	5.6	5.6	180.621	36.5	1.01912e+11	4.16045e+12	0.0244955	(Patterson & Simpson, 1996)
Parafurgasonia zhangi	Eukaryota	Ciliates	55.5	25	12.5	9081.19	1176	3.28353e+12	1.85983e+14	0.017655	(Fan et al., 2014)
Paramecium caudatum	Eukaryota	Ciliates	242	48	48	291943	169704	4.73833e+14	5387826596472934	0.0879451	(Brennen & Winet, 1977; Lisicki et al., 2019)
Paramecium tetraurelia	Eukaryota	Ciliates	124	60	60	233735	44000	1.22853e+14	4342473378076561	0.028291	(Aubusson-Fleury et al., 2017; Bayless et al., 2019; Lisicki et al., 2019)
Peranema fusiforme	Eukaryota	Euglenids	27.5	5.3	5.3	404.468	35.5	1.9824e+11	9.09395e+12	0.0217991	(Patterson & Simpson, 1996)
Peranema trichophorum	Eukaryota	Euglenids	55	12	12	4146.91	80	4.46738e+11	8.69497e+13	0.00513789	(Brennen & Winet, 1977)
Peranema trichophorum	Eukaryota	Euglenids	74	19	19	13987.5	79	4.41154e+11	282775291193329	0.00156009	(Saito et al., 2003)
Petalomonas abscissa	Eukaryota	Euglenids	15.5	6.55	6.55	348.188	26.25	1.46586e+11	7.86384e+12	0.0186405	(Patterson & Simpson, 1996)
Petalomonas boadicea	Eukaryota	Euglenids	9	7	7	230.908	10	5.58423e+10	5.27971e+12	0.0105768	(Larsen & Patterson, 1990)
Petalomonas marginalis	Eukaryota	Euglenids	25	12.5	4.15	679.044	26	1.4519e+11	1.5032e+13	0.00965874	(Larsen & Patterson, 1990)
Petalomonas minor	Eukaryota	Euglenids	8	5.5	0.825	19.0067	8	4.46738e+10	4.68397e+11	0.095376	(Larsen & Patterson, 1990)
Petalomonas minuta	Eukaryota	Euglenids	7.5	4.8	1.4	26.3894	7.5	4.18817e+10	6.43965e+11	0.0650372	(Patterson & Simpson, 1996)
Petalomonas pusilla	Eukaryota	Euglenids	5	2.5	2.5	16.3625	7.5	4.18817e+10	4.05051e+11	0.103399	(Larsen & Patterson, 1990)
Picomonas judraskeda	Eukaryota	Picozoa	3.15	2.25	2.25	8.34978	21	5.86344e+10	2.10911e+11	0.278005	(Seenivasan et al., 2013)
Pleurostomum flabellatum	Eukaryota	Heterolobosea	12	2	2	25.1328	43	1.20061e+11	6.14198e+11	0.195476	(Park et al., 2007)
Pleurostomum flabellatum	Eukaryota	Heterolobosea	12.5	3.5	3.5	80.1762	26.5	7.3991e+10	1.89234e+12	0.0391002	(Patterson & Simpson, 1996)
Pleurostomum turgidum	Eukaryota	Heterolobosea	7.5	4.1	4.1	66.0129	47	1.31229e+11	1.56717e+12	0.0837368	(Patterson & Simpson, 1996)
Ploeotia adhaerens	Eukaryota	Euglenids	24	19.5	3.7	906.666	58	3.23885e+11	1.98975e+13	0.0162777	(Larsen & Patterson, 1990)
Ploeotia azurina	Eukaryota	Euglenids	13.5	7	7	346.361	50.5	2.82003e+11	7.82382e+12	0.0360442	(Patterson & Simpson, 1996)
Ploeotia corrugata	Eukaryota	Euglenids	12.5	5.5	5.5	197.986	44	2.45706e+11	4.5479e+12	0.0540262	(Patterson & Simpson, 1996)
Ploeotia costata	Eukaryota	Euglenids	19	12.1	12.1	1456.55	63	3.51806e+11	3.15137e+13	0.0111636	(Patterson & Simpson, 1996)
Ploeotia decipiens	Eukaryota	Euglenids	18	11.5	2.9	314.317	54	3.01548e+11	7.12069e+12	0.0423482	(Larsen & Patterson, 1990)
Ploeotia heracleum	Eukaryota	Euglenids	14	10	1.5	109.956	42	2.34538e+11	2.57074e+12	0.0912336	(Larsen & Patterson, 1990)
Ploeotia longifilum	Eukaryota	Euglenids	16	11	11	1013.69	91.5	5.10957e+11	2.21719e+13	0.0230452	(Larsen & Patterson, 1990)
Ploeotia oblonga	Eukaryota	Euglenids	26	12	12	1960.36	87	4.85828e+11	4.20378e+13	0.0115569	(Patterson & Simpson, 1996)
Ploeotia pseudanisonema	Eukaryota	Euglenids	18.5	10.3	10.3	1027.65	83.5	4.66283e+11	2.24681e+13	0.0207532	(Patterson & Simpson, 1996)
Ploeotia punctata	Eukaryota	Euglenids	10	5.05	5.05	133.531	50.5	2.82003e+11	3.10377e+12	0.0908583	(Patterson & Simpson, 1996)
Ploeotia tenuis	Eukaryota	Euglenids	18	12	2.5	282.744	54	3.01548e+11	6.42579e+12	0.0469278	(Larsen & Patterson, 1990)
Ploeotia vitrea	Eukaryota	Euglenids	23	12.1	12.1	1763.19	69	3.85312e+11	3.79301e+13	0.0101585	(Patterson & Simpson, 1996)
Polytoma uvella	Eukaryota	Chlorophyta	22	11	11	1393.82	78	2.17785e+11	3.01965e+13	0.00721226	(Brennen & Winet, 1977)
Polytomella agilis	Eukaryota	Chlorophyta	9.8	4.9	4.9	123.202	34	9.49319e+10	2.87061e+12	0.0330703	(Brennen & Winet, 1977)
Psammosa pacifica	Eukaryota	Perkinsidae	7.5	4.5	4.5	79.5217	22.5	6.28226e+10	1.87736e+12	0.0334633	(Okamoto et al., 2012)
Pseudobodo tremulans	Eukaryota	Opalozoa	5	5	5	65.45	17.5	4.8862e+10	1.5542e+12	0.0314386	(Patterson & Simpson, 1996)
Pseudobodo tremulans	Eukaryota	Opalozoa	4	4	4	33.5104	20	5.58423e+10	8.11894e+11	0.0687803	(Larsen & Patterson, 1990)
Pseudoperanema (Peranema) fusiforme	Eukaryota	Euglenids	40	13.6	13.6	3873.8	121	6.75691e+11	8.13895e+13	0.00830195	(Larsen & Patterson, 1990)
Pseudoperanema (Peranema) trichophorum	Eukaryota	Euglenids	28	5.9	5.9	510.342	49	2.73627e+11	1.13946e+13	0.0240137	(Larsen & Patterson, 1990)
Pseudoperanema dolichonema	Eukaryota	Euglenids	28	6.5	6.5	619.419	75	4.18817e+11	1.37499e+13	0.0304596	(Larsen & Patterson, 1990)
Pyramimonas octopus	Eukaryota	Chlorophyta	17.05	9.05	9.05	731.175	136	3.79727e+11	1.61501e+13	0.0235124	(Wan & Goldstein, 2018)
Rhabdomonas spiralis	Eukaryota	Euglenids	40	10	10	2094.4	27	1.50774e+11	4.48232e+13	0.00336375	(Brennen & Winet, 1977)
Rhodelphis limneticus	Eukaryota	Rhodophyta	11.5	8	8	385.37	28.75	8.02733e+10	8.67713e+12	0.00925113	(Gawryluk et al., 2019)
Rhodelphis marinus	Eukaryota	Rhodophyta	11	7.75	7.75	345.936	34	9.49319e+10	7.81449e+12	0.0121482	(Gawryluk et al., 2019)
Rhynchobodo simius	Eukaryota	Kinetoplastea	10.5	4	4	87.9648	34.75	1.94052e+11	2.0704e+12	0.0937267	(Patterson & Simpson, 1996)
Rhynchomonas nasuta	Eukaryota	Kinetoplastea	7	5.25	3	57.7269	16	8.93476e+10	1.37598e+12	0.0649338	(Larsen & Patterson, 1990)
Spironema goodeyi	Eukaryota	Hemimastigophora	35	4	4	293.216	120	3.35054e+11	6.65652e+12	0.0503347	(Foissner & Foissner, 1993)
Spironema multiciliatum	Eukaryota	Hemimastigophora	16	2.5	2.5	52.36	47.5	1.32625e+11	1.25171e+12	0.105955	(Foissner & Foissner, 1993)
Spironema terricola	Eukaryota	Hemimastigophora	40	3.5	3.5	256.564	160	4.46738e+11	5.84783e+12	0.0763938	(Foissner & Foissner, 1993)
Stephanopogon minuta	Eukaryota	Heterolobosea	26.5	12.3	12.3	2099.21	1433.6	4.00277e+12	4.4923e+13	0.0891029	(Yubuki & Leander, 2008)
Stereonema geiseri	Eukaryota	Hemimastigophora	25	6.5	6.5	553.053	264	7.37118e+11	1.23185e+13	0.0598382	(Foissner & Foissner, 1993)
Strigomonas oncopelti	Eukaryota	Kinetoplastea	8.2	2.6	2.6	29.0242	17	9.49319e+10	7.0624e+11	0.134419	(Brennen & Winet, 1977)
Tetrahymena thermophila	Eukaryota	Ciliates	41	24	24	12365.3	4125	1.15175e+13	2.50908e+14	0.0459031	(Bayless et al., 2019)
Tiarina fusa	Eukaryota	Ciliates	87.5	25	25	28634.4	3097.5	8.64857e+12	5.66573e+14	0.0152647	(Chen et al., 2012)
Trachelocerca ditis	Eukaryota	Ciliates	180.4	58.3	58.3	321050	15603	4.35653e+13	5908144895809365	0.00737378	(Yan et al., 2013)
Tracheloraphis dragescoi	Eukaryota	Ciliates	433.8	46.3	46.3	486913	98498	2.75018e+14	8849173051752731	0.0310783	(Xu et al., 2014)
Trimastix convexa	Eukaryota	Preaxostyla	20	8	8	670.208	90	2.5129e+11	1.48422e+13	0.0169308	(Brugerolle & Patterson, 1997)
Tritrichomonas foetus	Eukaryota	Parabasalids	14.6	6.7	6.7	343.164	65.9	1.84e+11	7.75376e+12	0.0237305	(Lenaghan et al., 2014)
Trypanosoma brucei	Eukaryota	Kinetoplastea	25	3.5	3.5	160.352	30	1.67527e+11	3.70679e+12	0.0451945	(Heddergott et al., 2012)
Trypanosoma cruzi	Eukaryota	Kinetoplastea	20	2	2	41.888	12.4	6.92444e+10	1.0081e+12	0.0686883	(Brennen & Winet, 1977; Portman & Gull, 2010)
Urceolus cornutus	Eukaryota	Euglenids	30	15	15	3534.3	30	1.67527e+11	7.44611e+13	0.00224986	(Larsen & Patterson, 1990)
Urceolus cristatus	Eukaryota	Euglenids	23	12.5	12.5	1881.69	41.5	2.31745e+11	4.04004e+13	0.00573621	(Larsen & Patterson, 1990)
Uronemella sinensis	Eukaryota	Ciliates	30	17.5	17.5	4810.57	2115	5.90532e+12	1.00417e+14	0.0588081	(Pan et al., 2013)
References
Aono, R., Ogino, H., & Horikoshi, K. (1992). pH-dependent flagella formation by facultative alkaliphilic Bacillus sp. C-125. Bioscience, biotechnology, and biochemistry, 56(1), 48-53.
Aubusson-Fleury, A., Balavoine, G., Lemullois, M., Bouhouche, K., Beisson, J., & Koll, F. (2017). Centrin diversity and basal body patterning across evolution: new insights from Paramecium. Biology open, 6(6), 765-776.
Bayless, B. A., Navarro, F. M., & Winey, M. (2019). Motile cilia: innovation and insight from ciliate model organisms. Frontiers in cell and developmental biology, 7, 265.
Boone, D. R., Castenholz, R. W., & Garrity, G. M. (Eds.). (2001). Bergey's Manual of Systematic Bacteriology (2nd ed.). Springer Science+Business Media.
Brennen, C., & Winet, H. (1977). Fluid mechanics of propulsion by cilia and flagella. Annual Review of Fluid Mechanics, 9(1), 339-398.
Briegel, A., Ortega, D. R., Tocheva, E. I., Wuichet, K., Li, Z., Chen, S., . . . Dobro, M. J. (2009). Universal architecture of bacterial chemoreceptor arrays. Proceedings of the National Academy of Sciences, 106(40), 17181-17186.
Brugerolle, G., & Bordereau, C. (2003). Ultrastructure of Joenoides intermedia (Grassé 1952), a symbiotic parabasalid flagellate of Hodotermes mossambicus, and its comparison with other joeniid genera. European journal of protistology, 39(1), 1-10.
Brugerolle, G., & Bordereau, C. (2004). The flagellates of the termite Hodotermopsis sjoestedti with special reference to Hoplonympha, Holomastigotes and Trichomonoides trypanoides n. comb. European journal of protistology, 40(2), 163-174.
Brugerolle, G., & Bordereau, C. (2005). Pachyjoenia howa, a new symbiotic parabasalid joeniid flagellate of the termite Postelectrotermes howa. European journal of protistology, 41(1), 7-17.
Brugerolle, G., & Patterson, D. (1997). Ultrastructure of Trimastix convexa Hollande, an amitochondriate anaerobic flagellate with a previously undescribed organization. European Journal of Protistology, 33(2), 121-130.
Brun, Y. V., Marczynski, G., & Shapiro, L. (1994). The expression of asymmetry during Caulobacter cell differentiation. Annual review of biochemistry, 63(1), 419-450.
Carpenter, K. J., & Keeling, P. J. (2007). Morphology and phylogenetic position of Eucomonympha imla (Parabasalia: Hypermastigida). Journal of Eukaryotic Microbiology, 54(4), 325-332.
Cavalier-Smith, T., Lewis, R., Chao, E. E., Oates, B., & Bass, D. (2009). Helkesimastix marina n. sp.(Cercozoa: Sainouroidea superfam. n.) a gliding zooflagellate of novel ultrastructure and unusual ciliary behaviour. Protist, 160(3), 452-479.
Chalcroft, J. P., Bullivant, S., & Howard, B. (1973). Ultrastructural studies on Selenomonas ruminantium from the sheep rumen. Microbiology, 79(1), 135-146.
Chantangsi, C., Esson, H. J., & Leander, B. S. (2008). Morphology and molecular phylogeny of a marine interstitial tetraflagellate with putative endosymbionts: Auranticordis quadriverberis n. gen. et sp.(Cercozoa). BMC microbiology, 8(1), 1-16.
Chantangsi, C., Lynn, D. H., Rueckert, S., Prokopowicz, A. J., Panha, S., & Leander, B. S. (2013). Fusiforma themisticola n. gen., n. sp., a new genus and species of apostome ciliate infecting the hyperiid amphipod Themisto libellula in the Canadian Beaufort Sea (Arctic Ocean), and establishment of the Pseudocolliniidae (Ciliophora, Apostomatia). Protist, 164(6), 793-810.
Charon, N. W., Cockburn, A., Li, C., Liu, J., Miller, K. A., Miller, M. R., . . . Wolgemuth, C. W. (2012). The unique paradigm of spirochete motility and chemotaxis. Annual review of microbiology, 66, 349-370.
Charon, N. W., Goldstein, S., Block, S., Curci, K., Ruby, J., Kreiling, J., & Limberger, R. (1992). Morphology and dynamics of protruding spirochete periplasmic flagella. Journal of bacteriology, 174(3), 832-840.
Chattopadhyay, S., & Wu, X.-L. (2009). The effect of long-range hydrodynamic interaction on the swimming of a single bacterium. Biophysical Journal, 96(5), 2023-2028.
Chen, X., Gao, S., Liu, W., Song, W., Al-Rasheid, K. A., & Warren, A. (2012). Taxonomic descriptions of three marine colepid ciliates, Nolandia sinica spec. nov., Apocoleps caoi spec. nov. and Tiarina fusa (Claparède & Lachmann, 1858) Bergh, 1881 (Ciliophora, Prorodontida). International journal of systematic and evolutionary microbiology, 62(Pt_3), 735-744.
Driks, A., Bryan, R., Shapiro, L., & DeRosier, D. (1989). The organization of the Caulobacter crescentus flagellar filament. Journal of molecular biology, 206(4), 627-636.
Fan, X., Ma, R., Al-Farraj, S. A., & Gu, F. (2014). Morphological and molecular characterization of Parafurgasonia zhangi spec. nov. and Chilodonella acuta Kahl, 1931 (Protozoa, Ciliophora), from a soil habitat of Saudi Arabia. International journal of systematic and evolutionary microbiology, 64(Pt_7), 2385-2394.
Foissner, I., & FOISSNER, W. (1993). Revision of the Family Spironemidae Doflein (Protista, Hemimastigophora), With Description of Two New Species, Spironema Terricola N. Sp. and Stereonema Geiseri N, G., N. Sp. Journal of Eukaryotic Microbiology, 40(4), 422-438.
Fujinami, S., Terahara, N., Lee, S., & Ito, M. (2007). Na+ and flagella-dependent swimming of alkaliphilic Bacillus pseudofirmus OF4: a basis for poor motility at low pH and enhancement in viscous media in an “up-motile” variant. Archives of microbiology, 187(3), 239-247.
Gawryluk, R. M., Tikhonenkov, D. V., Hehenberger, E., Husnik, F., Mylnikov, A. P., & Keeling, P. J. (2019). Non-photosynthetic predators are sister to red algae. Nature, 572(7768), 240-243.
Goldstein, S. F., Buttle, K. F., & Charon, N. W. (1996). Structural analysis of the Leptospiraceae and Borrelia burgdorferi by high-voltage electron microscopy. Journal of bacteriology, 178(22), 6539-6545.
Guadayol, Ò., Thornton, K. L., & Humphries, S. (2017). Cell morphology governs directional control in swimming bacteria. Scientific reports, 7(1), 1-13.
Heddergott, N., Krüger, T., Babu, S. B., Wei, A., Stellamanns, E., Uppaluri, S., . . . Engstler, M. (2012). Trypanosome motion represents an adaptation to the crowded environment of the vertebrate bloodstream. PLoS pathogens, 8(11), e1003023.
Heiss, A. A., Heiss, A. W., Lukacs, K., & Kim, E. (2017). The flagellar apparatus of the glaucophyte Cyanophora cuspidata. Journal of phycology, 53(6), 1120-1150.
Heiss, A. A., Walker, G., & Simpson, A. G. (2013). The flagellar apparatus of Breviata anathema, a eukaryote without a clear supergroup affinity. European journal of protistology, 49(3), 354-372.
Hess, S., Eme, L., Roger, A. J., & Simpson, A. G. (2019). A natural toroidal microswimmer with a rotary eukaryotic flagellum. Nature microbiology, 4(10), 1620-1626.
Hoeniger, J. F. M. (1965). Development of flagella by Proteus mirabilis. Microbiology, 40(1), 29-42.
Hyams, J. S. (1982). The Euglena paraflagellar rod: structure, relationship to other flagellar components and preliminary biochemical characterization. Journal of Cell Science, 55(1), 199-210.
Ito, M., & Takahashi, Y. (2017). Nonconventional cation-coupled flagellar motors derived from the alkaliphilic Bacillus and Paenibacillus species. Extremophiles, 21(1), 3-14. https://doi.org/10.1007/s00792-016-0886-y
Izard, J., Hsieh, C.-E., Limberger, R. J., Mannella, C. A., & Marko, M. (2008). Native cellular architecture of Treponema denticola revealed by cryo-electron tomography. Journal of structural biology, 163(1), 10-17.
James, E. R., Okamoto, N., Burki, F., Scheffrahn, R. H., & Keeling, P. J. (2013). Cthulhu macrofasciculumque ng, n. sp. and Cthylla microfasciculumque ng, n. sp., a newly identified lineage of parabasalian termite symbionts. PLoS One, 8(3), e58509.
Janouskovec, J., Tikhonenkov, D. V., Burki, F., Howe, A. T., Rohwer, F. L., Mylnikov, A. P., & Keeling, P. J. (2017). A New Lineage of Eukaryotes Illuminates Early Mitochondrial Genome Reduction. Current Biology, 27(23), 3717-3724. https://doi.org/10.1016/j.cub.2017.10.051
Jones, B. V., Young, R., Mahenthiralingam, E., & Stickler, D. J. (2004). Ultrastructure of Proteus mirabilis swarmer cell rafts and role of swarming in catheter-associated urinary tract infection. Infection and immunity, 72(7), 3941-3950.
Krieg, N. R. (1976). Biology of the chemoheterotrophic spirilla. Bacteriological Reviews, 40(1), 55--115.
Kudryashev, M., Cyrklaff, M., Baumeister, W., Simon, M. M., Wallich, R., & Frischknecht, F. (2009). Comparative cryo‐electron tomography of pathogenic Lyme disease spirochetes. Molecular microbiology, 71(6), 1415-1434.
Larsen, J., & Patterson, D. J. (1990). Some flagellates (protista) from tropical marine sediments. Journal of Natural History, 24(4), 801-937. https://doi.org/10.1080/00222939000770571
Lax, G., Eglit, Y., Eme, L., Bertrand, E. M., Roger, A. J., & Simpson, A. G. (2018). Hemimastigophora is a novel supra-kingdom-level lineage of eukaryotes. Nature, 564(7736), 410-414.
Lenaghan, S. C., Nwandu-Vincent, S., Reese, B. E., & Zhang, M. (2014). Unlocking the secrets of multi-flagellated propulsion: drawing insights from Tritrichomonas foetus. Journal of The Royal Society Interface, 11(93), 20131149.
Lisicki, M., Rodrigues, M. F. V., Goldstein, R. E., & Lauga, E. (2019). Swimming eukaryotic microorganisms exhibit a universal speed distribution. Elife, 8, e44907.
Magariyama, Y., Sugiyama, S., & Kudo, S. (2001). Bacterial swimming speed and rotation rate of bundled flagella. Fems Microbiology Letters, 199(1), 125-129.
Magariyama, Y., Sugiyama, S., Muramoto, K., Kawagishi, I., Imae, Y., & Kudo, S. (1995). Simultaneous measurement of bacterial flagellar rotation rate and swimming speed. Biophysical journal, 69(5), 2154-2162.
Malmström, J., Beck, M., Schmidt, A., Lange, V., Deutsch, E. W., & Aebersold, R. (2009). Proteome-wide cellular protein concentrations of the human pathogen Leptospira interrogans. Nature, 460(7256), 762-765.
McCarter, L. L. (2004). Dual flagellar systems enable motility under different circumstances. J Mol Microbiol Biotechnol, 7(1-2), 18-29. https://doi.org/10.1159/000077866
Miao, M., Wang, Y., Song, W., Clamp, J. C., & Al-Rasheid, K. A. (2010). Description of Eurystomatella sinica n. gen., n. sp., with establishment of a new family Eurystomatellidae n. fam.(Protista, Ciliophora, Scuticociliatia) and analyses of its phylogeny inferred from sequences of the small-subunit rRNA gene. International journal of systematic and evolutionary microbiology, 60(2), 460-468.
Murphy, G. E., Matson, E. G., Leadbetter, J. R., Berg, H. C., & Jensen, G. J. (2008). Novel ultrastructures of Treponema primitia and their implications for motility. Molecular microbiology, 67(6), 1184-1195.
Okamoto, N., Horak, A., & Keeling, P. J. (2012). Description of Two Species of Early Branching Dinoflagellates, Psammosa pacifica n. g., n. sp and P. atlantica n. sp. Plos One, 7(6), Article e34900. https://doi.org/10.1371/journal.pone.0034900
Pan, X., Zhu, M., Ma, H., Al-Rasheid, K. A., & Hu, X. (2013). Morphology and small-subunit rRNA gene sequences of two novel marine ciliates, Metanophrys orientalis spec. nov. and Uronemella sinensis spec. nov.(Protista, Ciliophora, Scuticociliatia), with an improved diagnosis of the genus Uronemella. International journal of systematic and evolutionary microbiology, 63(Pt_9), 3515-3523.
Park, J. S., Kolisko, M., Heiss, A. A., & Simpson, A. G. (2009). Light microscopic observations, ultrastructure, and molecular phylogeny of Hicanonectes teleskopos ng, n. sp., a deep‐branching relative of diplomonads. Journal of Eukaryotic Microbiology, 56(4), 373-384.
Park, J. S., Kolisko, M., & Simpson, A. G. (2010). Cell morphology and formal description of Ergobibamus cyprinoides ng, n. sp., another Carpediemonas‐like relative of diplomonads. Journal of Eukaryotic Microbiology, 57(6), 520-528.
Park, J. S., & Simpson, A. G. (2015). Diversity of heterotrophic protists from extremely hypersaline habitats. Protist, 166(4), 422-437.
Park, J. S., Simpson, A. G., Lee, W. J., & Cho, B. C. (2007). Ultrastructure and phylogenetic placement within Heterolobosea of the previously unclassified, extremely halophilic heterotrophic flagellate Pleurostomum flabellatum (Ruinen 1938). Protist, 158(3), 397-413.
Patterson, D. J., & Simpson, A. G. B. (1996). Heterotrophic flagellates from coastal marine and hypersaline sediments in Western Australia. European Journal of Protistology, 32(4), 423-448. https://doi.org/10.1016/s0932-4739(96)80003-4
Portman, N., & Gull, K. (2010). The paraflagellar rod of kinetoplastid parasites: From structure to components and function. International Journal for Parasitology, 40(2), 135-148. https://doi.org/10.1016/j.ijpara.2009.10.005
Radek, R., Strassert, J. F., Krüger, J., Meuser, K., Scheffrahn, R. H., & Brune, A. (2014). Phylogeny and Ultrastructure of Oxymonas jouteli, a Rostellum-free Species, and Opisthomitus longiflagellatus sp. nov., Oxymonadid Flagellates from the Gut of Neotermes jouteli. Protist, 165(3), 384-399.
Ramia, M., & Swan, M. (1994). The swimming of unipolar cells of Spirillum volutans: theory and observations. The Journal of experimental biology, 187(1), 75-100.
Saito, A., Suetomo, Y., Arikawa, M., Omura, G., Khan, S., Kakuta, S., . . . Suzaki, T. (2003). Gliding movement in Peranema trichophorum is powered by flagellar surface motility. Cell Motility and the Cytoskeleton, 55(4), 244-253. https://doi.org/10.1002/cm.10127
Seenivasan, R., Sausen, N., Medlin, L. K., & Melkonian, M. (2013). Picomonas judraskeda gen. et sp. nov.: the first identified member of the Picozoa phylum nov., a widespread group of picoeukaryotes, formerly known as ‘picobiliphytes’. PloS one, 8(3), e59565.
Simpson, A. G., & Patterson, D. J. (1999). The ultrastructure of Carpediemonas membranifera (Eukaryota) with reference to the “excavate hypothesis”. European Journal of Protistology, 35(4), 353-370.
Slivienski-Gebhardt, L. L., Izard, J., Samsonoff, W. A., & Limberger, R. J. (2004). Development of a novel chloramphenicol resistance expression plasmid used for genetic complementation of a fliG deletion mutant in Treponema denticola. Infection and immunity, 72(9), 5493-5497.
Taborsky, P., Panek, T., & Cepicka, I. (2017). Anaeramoebidae fam. nov., a Novel Lineage of Anaerobic Amoebae and Amoeboflagellates of Uncertain Phylogenetic Position. Protist, 168(5), 495-526. https://doi.org/10.1016/j.protis.2017.07.005
Terahara, N., Krulwich, T. A., & Ito, M. (2008). Mutations alter the sodium versus proton use of a Bacillus clausii flagellar motor and confer dual ion use on Bacillus subtilis motors. Proceedings of the national academy of sciences, 105(38), 14359-14364.
Terahara, N., Sano, M., & Ito, M. (2012). A Bacillus flagellar motor that can use both Na+ and K+ as a coupling ion is converted by a single mutation to use only Na+. Plos One 7(9): e46248. https://doi.org/10.1371/journal.pone.0046248
Thomashow, L. S., & Rittenberg, S. C. (1985). Waveform analysis and structure of flagella and basal complexes from Bdellovibrio bacteriovorus 109J. Journal of bacteriology, 163(3), 1038-1046.
Tikhonenkov, D. V., Janouskovec, J., Mylnikov, A. P., Mikhailov, K. V., Simdyanov, T. G., Aleoshin, V. V., & Keeling, P. J. (2014). Description of Colponema vietnamica sp.n. and Acavomonas peruviana n. gen. n. sp., Two New Alveolate Phyla (Colponemidia nom. nov and Acavomonidia nom. nov.) and Their Contributions to Reconstructing the Ancestral State of Alveolates and Eukaryotes. Plos One, 9(4), A…
Tong, S. M. (1995). Developayella elegans nov. gen., nov. spec., a new type of heterotrophic flagellate from marine plankton. European journal of protistology, 31(1), 24-31.
Treitli, S. C., Kotyk, M., Yubuki, N., Jirounková, E., Vlasáková, J., Smejkalová, P., . . . Hampl, V. (2018). Molecular and Morphological Diversity of the Oxymonad Genera Monocercomonoides and Blattamonas gen. nov. Protist, 169(5), 744-783.
Tsuda, M., & Iino, T. (1983). Transductional analysis of the flagellar genes in Pseudomonas aeruginosa. Journal of bacteriology, 153(2), 1018-1026.
Wan, K. Y., & Goldstein, R. E. (2018). Time irreversibility and criticality in the motility of a flagellate microorganism. Physical review letters, 121(5), 058103.
Weatherby, K., Murray, S., Carter, D., & Šlapeta, J. (2011). Surface and flagella morphology of the motile form of Chromera velia revealed by field-emission scanning electron microscopy. Protist, 162(1), 142-153.
Wolgemuth, C. W., Charon, N. W., Goldstein, S. F., & Goldstein, R. E. (2006). The flagellar cytoskeleton of the spirochetes. Journal of molecular microbiology and biotechnology, 11(3-5), 221-227.
Xu, Y., Yan, Y., Li, L., Al-Rasheid, K. A., Al-Farraj, S. A., & Song, W. (2014). Morphology and phylogeny of three karyorelictean ciliates (Protista, Ciliophora), including two novel species, Trachelocerca chinensis sp. n. and Tracheloraphis dragescoi sp. n. International journal of systematic and evolutionary microbiology, 64(Pt_12), 4084-4097.
Yan, Y., Xu, Y., Yi, Z., & Warren, A. (2013). Redescriptions of three trachelocercid ciliates (Protista, Ciliophora, Karyorelictea), with notes on their phylogeny based on small subunit rRNA gene sequences. International journal of systematic and evolutionary microbiology, 63(Pt_9), 3506-3514.
Yubuki, N., Inagaki, Y., Nakayama, T., & Inouye, I. (2007). Ultrastructure and ribosomal RNA phylogeny of the free‐living heterotrophic flagellate Dysnectes brevis n. gen., n. sp., a new member of the Fornicata. Journal of Eukaryotic Microbiology, 54(2), 191-200.
Yubuki, N., & Leander, B. S. (2008). Ultrastructure and molecular phylogeny of Stephanopogon minuta: an enigmatic microeukaryote from marine interstitial environments. European journal of protistology, 44(4), 241-253.
Yubuki, N., Simpson, A. G., & Leander, B. S. (2013). Comprehensive ultrastructure of Kipferlia bialata provides evidence for character evolution within the Fornicata (Excavata). Protist, 164(3), 423-439.
Yubuki, N., Zadrobílková, E., & Čepička, I. (2017). Ultrastructure and molecular phylogeny of Iotanema spirale gen. nov. et sp. nov., a new lineage of endobiotic Fornicata with strikingly simplified ultrastructure. Journal of Eukaryotic Microbiology, 64(4), 422-433.
