# Supplementary material for: Flagellar energy costs across the tree of life
Source: eLife. 2022 Jul 26;11:e77266. doi: 10.7554/eLife.77266 (PMC9323006; doi:10.7554/eLife.77266)
Supplement: Figure 2—source data 1. [file elife-77266-fig2-data1.xlsx]

## Sheet: Sheet1
For cell volume references see Figure 1-source data 1.
* Because of its ciliated nature Opalina ranarum is grouped with ciliates here, but in reality it belongs to a different phylum.
Species	Domain	Phylum	Cell volume (µm^3)	Total flagellar cost (ATP)	Relative cost	Swimming speed (µm/s)	Swimming speed (cell lengths/s)	Swimming speed per ATP (cell length/s/ATP)	Swimming power, Stokes' law (ATP/s)	Swimming power, Empirical (ATP/s)	Relative growth rate	References (swimming speed only)
Bacillus alcalophilus	Bacteria	Firmicutes	1.07443	6.07855e+08	0.0210612	18	17.5744	2.33031e-08	46.7517		0.963211	(Terahara et al., 2012)
Bacillus clausii	Bacteria	Firmicutes	0.791683	2177391456	0.101453	20	21.6195	8.00281e-09	52.1319		0.834476	(Terahara et al., 2008)
Bacillus halodurans	Bacteria	Firmicutes	0.787985	6.85878e+09	0.321033	53	57.3812	6.74304e-09	365.526		0.615033	(Aono et al., 1992; Ito & Takahashi, 2017)
Bacillus megaterium	Bacteria	Firmicutes	4.41787	1.92699e+10	0.169413	22	13.4076	5.60795e-10	111.886		0.752417	(Lynch & Trickovic, 2020)
Bacillus pseudofirmus	Bacteria	Firmicutes	1.64201	1.87498e+08	0.00430533	22	18.6479	8.01619e-08	80.4447		0.996728	(Terahara et al., 2012)
Bdellovibrio bacteriovorus	Bacteria	Proteobacteria	0.0646319	5.09091e+08	0.269518	160	398.692	6.31211e-07	1447.38		0.658165	(Jarrell & McBride, 2008)
Borrelia burgdorferi	Bacteria	Spirochaetes	1.27354	7348696164	0.21591	35	32.2897	3.54149e-09	187.069		0.703807	(Charon et al., 2012; Goldstein et al., 1994; Kimsey & Spielman, 1990)
Caulobacter crescentus	Bacteria	Alpha-proteobacteria	0.908852	1.84473e+08	0.00751831	30	30.9711	1.35318e-07	122.819		0.991036	(Chattopadhyay & Wu, 2009)
Escherichia coli	Bacteria	Gamma-proteobacteria	0.564441	5.75799e+08	0.03725	25	30.2506	4.23444e-08	72.769		0.934608	(Guadayol et al., 2017; Jarrell & McBride, 2008; Stocker & Seymour, 2012)
Escherichia coli	Bacteria	Gamma-proteobacteria	4.41787	1.68748e+09	0.0148356	25	15.2359	7.27718e-09	144.481		0.979286	(Guadayol et al., 2017; Jarrell & McBride, 2008; Stocker & Seymour, 2012)
Proteus mirabilis	Bacteria	Gamma-proteobacteria	0.376076	491425155	0.0471374	26	36.0204	5.90777e-08	68.7435		0.917367	(Lynch & Trickovic, 2020)
Pseudomonas aeruginosa	Bacteria	Gamma-proteobacteria	0.2618	120966192	0.0164876	58.9	92.0715	6.13471e-07	312.666		0.975506	(Lynch & Trickovic, 2020)
Salmonella typhimurium	Bacteria	Gamma-proteobacteria	0.484111	8.44646e+08	0.0634167	40	50.9423	4.86112e-08	176.995		0.893133	(Harshey & Matsuyama, 1994)
Sarcina ureae	Bacteria	Firmicutes	4.1888	483864768	0.00447942	23.55	14.6092	2.43353e-08	125.952		0.998782	(Lynch & Trickovic, 2020)
Selenomonas ruminantium	Bacteria	Firmicutes	70.686	10584541800	0.00632039	16	3.86968	2.9467e-10	149.123		1.00067	(Haya et al., 2011)
Serratia marcescens	Bacteria	Gamma-proteobacteria	0.163625	4.35478e+08	0.0936391	34	62.1626	1.15052e-07	89.0775		0.845477	(Lynch & Trickovic, 2020)
Spirillum serpens	Bacteria	Beta-proteobacteria	2.0944	2.03223e+09	0.0368528	23	17.9766	7.12964e-09	95.3533		0.936954	(Lynch & Trickovic, 2020)
Spirillum volutans	Bacteria	Beta-proteobacteria	31.8389	4.5952e+10	0.0594785	82	25.8719	4.53791e-10	3002.44		0.93732	(Ramia & Swan, 1994)
Treponema primitia	Bacteria	Spirochaetes	0.593652	302415480	0.0186296	12	14.2781	3.80539e-08	17.0503		0.966081	(Murphy et al., 2008)
Vibrio alginolyticus	Bacteria	Gamma-proteobacteria	1.32978	7.20215e+08	0.0202918	81	73.6589	8.2432e-08	1016.46		0.978085	(Johansen et al., 2002; Stocker & Seymour, 2012)
Vibrio cholera	Bacteria	Gamma-proteobacteria	0.453274	3.89305e+08	0.0311562	52.55	68.4099	1.41632e-07	298.854		0.949073	(Lynch & Trickovic, 2020)
Bodo designis	Eukaryota	Kinetoplastea	70.5551	2.01032e+11	0.120259	39	9.43818	3.78404e-11	885.453	2473200	0.831363	(Lisicki et al., 2019)
Cafeteria roenbergensis	Eukaryota	Opalozoa	24.2335	3.07132e+10	0.0518044	94.9	32.794	8.60599e-10	3671.68	755700	0.952635	(Lisicki et al., 2019)
Cafeteria roenbergensis	Eukaryota	Opalozoa	18.4726	3.21093e+10	0.0704731	94.9	35.8996	9.01139e-10	3354.04	790050	0.917893	(Lisicki et al., 2019)
Ceratium fusus	Eukaryota	Dinoflagellata	114040	2.23369e+12	0.00103182	156.25	3.22206	1.16264e-12	166796	27480000	1.58815	(Lisicki et al., 2019)
Chlamydomonas sp.	Eukaryota	Chlorophyta	1150.35	3.51806e+10	0.00140354	96.8	9.23844	2.11655e-10	13832.1	865620	1.15276	(Lisicki et al., 2019; Ojakian & Katz, 1973)
Euglena gracilis	Eukaryota	Euglenids	5301.45	2.5129e+11	0.00227739	111.25	6.38021	2.04641e-11	30403.6	3091500	1.24667	(Lisicki et al., 2019)
Euglena viridis	Eukaryota	Euglenids	7868.66	4.02064e+11	0.00248426	80	4.02213	8.06294e-12	17933.9	4946400	1.21302	(Lisicki et al., 2019)
Menoidium cultellus	Eukaryota	Euglenids	1154.54	1.17269e+11	0.00466199	136.75	13.0354	8.95932e-11	27638.7	1442700	1.19193	(Lisicki et al., 2019)
Monas stigmata	Eukaryota	Unclear	113.098	5.0258e+10	0.0190231	269	55.6247	8.92062e-10	49300.3	1236600	1.1452	(Lisicki et al., 2019)
Ochromonas malhamensis	Eukaryota	Ochrophyta	14.1372	6.44978e+10	0.183492	57.5	23.7801	2.97167e-10	1126.29	1586970	0.751464	(Lisicki et al., 2019)
Opalina ranarum	Eukaryota	Ciliates*	2.29881e+06	4202284294341074	0.105378	50	0.378851	7.26635e-17	46483.8	103397278500	1.27788	(Lisicki et al., 2019)
Paramecium caudatum	Eukaryota	Ciliates	291943	4.73833e+14	0.0879451	2489.35	37.525	6.38304e-14	5.79159e+07	11658664800	2.93602	(Lisicki et al., 2019)
Paramecium tetraurelia	Eukaryota	Ciliates	233735	1.22853e+14	0.028291	784	12.7275	8.35004e-14	5.33417e+06	3022800000	2.33523	(Lisicki et al., 2019)
Peranema trichophorum	Eukaryota	Euglenids	4146.91	4.46738e+11	0.00513789	20	1.24486	2.24596e-12	905.375	5496000	1.04839	(Lisicki et al., 2019)
Peranema trichophorum	Eukaryota	Euglenids	13987.5	4.41154e+11	0.00156009	20	0.830075	1.51656e-12	1357.79	5427300	1.08117	(Lisicki et al., 2019)
Polytoma uvella	Eukaryota	Chlorophyta	1393.82	2.17785e+11	0.00721226	100.9	9.03279	3.34293e-11	16021.8	5358600	1.15266	(Lisicki et al., 2019)
Polytomella agilis	Eukaryota	Chlorophyta	123.202	9.49319e+10	0.0330703	150	30.1452	2.55941e-10	15773	2335800	1.05249	(Lisicki et al., 2019)
Pseudoperanema (Peranema) trichophorum	Eukaryota	Euglenids	510.342	2.73627e+11	0.0240137	20	2.5027	7.37196e-12	450.34	3366300	0.983827	(Lisicki et al., 2019)
Pyramimonas octopus	Eukaryota	Chlorophyta	731.175	3.79727e+11	0.0235124	428	47.5084	1.0084e-10	232499	9343200	1.33475	(Wan & Goldstein, 2018)
Rhabdomonas spiralis	Eukaryota	Euglenids	2094.4	1.50774e+11	0.00336375	120	9.3791	5.0138e-11	25956.3	1854900	1.20531	(Lisicki et al., 2019)
Tetrahymena thermophila	Eukaryota	Ciliates	12365.3	1.15175e+13	0.0459031	204.5	8.84351	6.18871e-13	136243	283387500	1.32842	(Lisicki et al., 2019)
Trypanosoma brucei	Eukaryota	Kinetoplastea	160.352	1.67527e+11	0.0451945	20.5	3.77336	1.81542e-11	321.657	2061000	0.93732	(Lisicki et al., 2019)
Trypanosoma cruzi	Eukaryota	Kinetoplastea	41.888	6.92444e+10	0.0686883	172	49.5258	5.76474e-10	14474.8	851880	0.96847	(Lisicki et al., 2019)
Uronemella sinensis	Eukaryota	Ciliates	4810.57	5.90532e+12	0.0588081	250	14.8095	2.0213e-12	148641	145300500	1.27085	(Lisicki et al., 2019)
References
Aono, R., Ogino, H., & Horikoshi, K. (1992). pH-dependent flagella formation by facultative alkaliphilic Bacillus sp. C-125. Bioscience, biotechnology, and biochemistry, 56(1), 48-53.
Charon, N. W., Cockburn, A., Li, C., Liu, J., Miller, K. A., Miller, M. R., . . . Wolgemuth, C. W. (2012). The unique paradigm of spirochete motility and chemotaxis. Annual review of microbiology, 66, 349-370.
Chattopadhyay, S., & Wu, X.-L. (2009). The effect of long-range hydrodynamic interaction on the swimming of a single bacterium. Biophysical Journal, 96(5), 2023-2028.
Goldstein, S. F., Charon, N. W., & Kreiling, J. A. (1994). Borrelia burgdorferi swims with a planar waveform similar to that of eukaryotic flagella. Proceedings of the National Academy of Sciences, 91(8), 3433-3437.
Guadayol, Ò., Thornton, K. L., & Humphries, S. (2017). Cell morphology governs directional control in swimming bacteria. Scientific reports, 7(1), 1-13.
Harshey, R. M., & Matsuyama, T. (1994). Dimorphic transition in Escherichia coli and Salmonella typhimurium: surface-induced differentiation into hyperflagellate swarmer cells. Proceedings of the National Academy of Sciences of the United States of America, 91(18), 8631-8635. https://doi.org/10.1073/pnas.91.18.8631
Haya, S., Tokumaru, Y., Abe, N., Kaneko, J., & Aizawa, S.-i. (2011). Characterization of lateral flagella of Selenomonas ruminantium. Applied and environmental microbiology, 77(8), 2799-2802.
Ito, M., & Takahashi, Y. (2017). Nonconventional cation-coupled flagellar motors derived from the alkaliphilic Bacillus and Paenibacillus species. Extremophiles, 21(1), 3-14. https://doi.org/10.1007/s00792-016-0886-y
Jarrell, K. F., & McBride, M. J. (2008). The surprisingly diverse ways that prokaryotes move. Nature reviews microbiology, 6(6), 466-476.
Johansen, J. E., Pinhassi, J., Blackburn, N., Zweifel, U. L., & Hagström, Å. (2002). Variability in motility characteristics among marine bacteria. Aquatic microbial ecology, 28(3), 229-237.
Kimsey, R. B., & Spielman, A. (1990). Motility of Lyme disease spirochetes in fluids as viscous as the extracellular matrix. Journal of Infectious Diseases, 162(5), 1205-1208.
Lisicki, M., Rodrigues, M. F. V., Goldstein, R. E., & Lauga, E. (2019). Swimming eukaryotic microorganisms exhibit a universal speed distribution. Elife, 8, e44907.
Lynch, M., & Trickovic, B. (2020). A Theoretical Framework for Evolutionary Cell Biology. Journal of Molecular Biology, 432(7), 1861-1879. https://doi.org/10.1016/j.jmb.2020.02.006
Murphy, G. E., Matson, E. G., Leadbetter, J. R., Berg, H. C., & Jensen, G. J. (2008). Novel ultrastructures of Treponema primitia and their implications for motility. Molecular microbiology, 67(6), 1184-1195.
Ojakian, G., & Katz, D. (1973). A simple technique for the measurement of swimming speed of Chlamydomonas. Experimental cell research, 81(2), 487-491.
Ramia, M., & Swan, M. (1994). The swimming of unipolar cells of Spirillum volutans: theory and observations. The Journal of experimental biology, 187(1), 75-100.
Stocker, R., & Seymour, J. R. (2012). Ecology and physics of bacterial chemotaxis in the ocean. Microbiology and Molecular Biology Reviews, 76(4), 792-812.
Terahara, N., Krulwich, T. A., & Ito, M. (2008). Mutations alter the sodium versus proton use of a Bacillus clausii flagellar motor and confer dual ion use on Bacillus subtilis motors. Proceedings of the national academy of sciences, 105(38), 14359-14364.
Terahara, N., Sano, M., & Ito, M. (2012). A Bacillus flagellar motor that can use both Na+ and K+ as a coupling ion is converted by a single mutation to use only Na+. Plos One 7(9): e46248. https://doi.org/10.1371/journal.pone.0046248
Wan, K. Y., & Goldstein, R. E. (2018). Time irreversibility and criticality in the motility of a flagellate microorganism. Physical review letters, 121(5), 058103.
