# Supplementary material for: Flagellar energy costs across the tree of life
Source: eLife. 2022 Jul 26;11:e77266. doi: 10.7554/eLife.77266 (PMC9323006; doi:10.7554/eLife.77266)
Supplement: Figure 3—source data 1. [file elife-77266-fig3-data1.xlsx]

## Sheet: Sheet1
For references see Figure 1-source data 1.
Bacteria				Relative cost of adding a single (average) amino acid
			Copies per flagellum	1	10	100	10000
			Cost per AA (ATP)	29
Species	Cell volume (um^3)	Number of flagella		Ncopies = 1	Ncopies = 10	Ncopies = 100	Ncopies = 10000
Sarcina ureae	4.1888	1		2.72343e-10	2.72343e-09	2.72343e-08	2.72343e-06
Cristispira balbiannii	249.234	100		5.3899e-10	5.3899e-09	5.3899e-08	5.3899e-06
Selenomonas ruminantium	70.686	35		6.32457e-10	6.32457e-09	6.32457e-08	6.32457e-06
Bacillus pseudofirmus	1.64201	1		6.6921e-10	6.6921e-09	6.6921e-08	6.6921e-06
Vibrio alginolyticus	1.32978	1		8.19397e-10	8.19397e-09	8.19397e-08	8.19397e-06
Caulobacter crescentus	0.908852	1		1.18078e-09	1.18078e-08	1.18078e-07	1.18078e-05
Photobacterium phosphoreum	0.904781	1		1.18588e-09	1.18588e-08	1.18588e-07	1.18588e-05
Escherichia coli	4.41787	6		1.55263e-09	1.55263e-08	1.55263e-07	1.55263e-05
Spirochaeta litoralis	2.04371	3		1.6272e-09	1.6272e-08	1.6272e-07	1.6272e-05
Vibrio cholera	0.453274	1		2.30259e-09	2.30259e-08	2.30259e-07	2.30259e-05
Bacillus alcalophilus	1.07443	3		3.01658e-09	3.01658e-08	3.01658e-07	3.01658e-05
Treponema primitia	0.593652	2		3.55437e-09	3.55437e-08	3.55437e-07	3.55437e-05
Pseudomonas aeruginosa	0.2618	1		3.90007e-09	3.90007e-08	3.90007e-07	3.90007e-05
Escherichia coli	0.564441	2.8		5.22309e-09	5.22309e-08	5.22309e-07	5.22309e-05
Proteus mirabilis	0.376076	2		5.5092e-09	5.5092e-08	5.5092e-07	5.5092e-05
Spirillum volutans	31.8389	150		5.82873e-09	5.82873e-08	5.82873e-07	5.82873e-05
Spirillum serpens	2.0944	14		7.41709e-09	7.41709e-08	7.41709e-07	7.41709e-05
Salmonella typhosa	0.757682	6		8.43659e-09	8.43659e-08	8.43659e-07	8.43659e-05
Treponema denticola	0.453839	4		9.19935e-09	9.19935e-08	9.19935e-07	9.19935e-05
Bacillus megaterium	4.41787	36		9.31581e-09	9.31581e-08	9.31581e-07	9.31581e-05
Salmonella typhimurium	0.484111	4.9		1.05919e-08	1.05919e-07	1.05919e-06	0.000105919
Leptospira interrogans	0.176311	2		1.14005e-08	1.14005e-07	1.14005e-06	0.000114005
Clostridium tetani	1.14538	15		1.41848e-08	1.41848e-07	1.41848e-06	0.000141848
Bdellovibrio bacteriovorus	0.0646319	1		1.49381e-08	1.49381e-07	1.49381e-06	0.000149381
Borrelia burgdorferi	1.27354	18		1.53738e-08	1.53738e-07	1.53738e-06	0.000153738
Bacillus clausii	0.791683	12		1.61769e-08	1.61769e-07	1.61769e-06	0.000161769
Serratia marcescens	0.163625	4		2.44956e-08	2.44956e-07	2.44956e-06	0.000244956
Bacillus halodurans	0.787985	21		2.84371e-08	2.84371e-07	2.84371e-06	0.000284371
Proteus mirabilis	18.3828	2750		1.81059e-07	1.81059e-06	1.81059e-05	0.00181059
Eukaryotes					Relative cost of adding a single (average) amino acid
* Because of its ciliated nature Opalina ranarum is grouped with ciliates here, but in reality it belongs to a different phylum.				Copies per um	94	1125	29125
Species	Phylum	Cell volume (µm^3)	Total flagellar length (µm)		Inner arm dyneins	FAP20, 115, 252 & RIB72	Tubulins
Dinophysis acuta	Dinoflagellata	102953	130		1.80774e-10	2.16351e-09	5.6011e-08
Auranticordis quadriverberis	Cercozoa	87113.9	220		3.5974e-10	4.3054e-09	1.11462e-07
Ceratium fusus	Dinoflagellata	114040	400		5.03692e-10	6.02823e-09	1.56064e-07
Dolium sedentarium	Euglenids	11023.9	43.5		5.28294e-10	6.32267e-09	1.63687e-07
Notosolenus triangularis	Euglenids	9163	51		7.41045e-10	8.86889e-09	2.29606e-07
Peranema trichophorum	Euglenids	13987.5	79		7.61573e-10	9.11457e-09	2.35966e-07
Notosolenus tamanduensis	Euglenids	6073.76	39		8.44426e-10	1.01062e-08	2.61637e-07
Anaeramoeba gargantua sp. nov., strain SIPEK1	Unclear	17974.2	120		9.0703e-10	1.08554e-08	2.81035e-07
Heteronema splendens	Euglenids	23562	166		9.64968e-10	1.15488e-08	2.98986e-07
Dinematomonas litoralis	Unclear (Excavata)	18326	140.5		1.0422e-09	1.24731e-08	3.22916e-07
Urceolus cornutus	Euglenids	3534.3	30		1.09829e-09	1.31444e-08	3.40295e-07
Euglena gracilis	Euglenids	5301.45	45		1.11173e-09	1.33053e-08	3.4446e-07
Euglena viridis	Euglenids	7868.66	72		1.21272e-09	1.45139e-08	3.75749e-07
Notosolenus ostium	Euglenids	5131.28	50		1.27498e-09	1.5259e-08	3.95039e-07
Chlamydomonas sp.	Chlorophyta	1150.35	12.6		1.3703e-09	1.63999e-08	4.24575e-07
Rhabdomonas spiralis	Euglenids	2094.4	27		1.64205e-09	1.96522e-08	5.08774e-07
Kovalevaia sulcata	Ciliates	407989	5025		1.83763e-09	2.19929e-08	5.69372e-07
Diplonema ambulator	Euglenozoa	454.519	7		1.8738e-09	2.24258e-08	5.80579e-07
Dinema validum	Euglenids	7866.11	122		2.05553e-09	2.46007e-08	6.36886e-07
Menoidium cultellus	Euglenids	1154.54	21		2.2758e-09	2.7237e-08	7.05135e-07
Anaeramoeba ignava sp. nov., strain BMAN	Unclear	1767.15	32		2.2948e-09	2.74644e-08	7.11023e-07
Peranema trichophorum	Euglenids	4146.91	80		2.50812e-09	3.00174e-08	7.77116e-07
Urceolus cristatus	Euglenids	1881.69	41.5		2.80019e-09	3.35129e-08	8.67613e-07
Heteronema exaratum	Euglenids	1548.55	35		2.85294e-09	3.41442e-08	8.83955e-07
Heteronema vittatum	Euglenids	3534.3	90		3.29488e-09	3.94333e-08	1.02089e-06
Notosolenus urceolatus	Euglenids	1281.05	34		3.33112e-09	3.98671e-08	1.03211e-06
Dinematomonas maculata	Unclear (Excavata)	2337.35	62		3.38985e-09	4.057e-08	1.05031e-06
Apocoleps caoi	Ciliates	129951	3306		3.66765e-09	4.38947e-08	1.13639e-06
Anisonema acinus	Euglenids	3706.3	106		3.70582e-09	4.43515e-08	1.14821e-06
Colponema globosum	Colponemida	1431.39	43		3.78298e-09	4.5275e-08	1.17212e-06
Pseudoperanema (Peranema) fusiforme	Euglenids	3873.8	121		4.05268e-09	4.85029e-08	1.25569e-06
Notosolenus esulcis	Euglenids	890.12	30		4.18415e-09	5.00762e-08	1.29642e-06
Dinematomonas inaequalis	Unclear (Excavata)	2024.11	70		4.4005e-09	5.26656e-08	1.36345e-06
Colponema loxodes	Colponemida	1627.28	59		4.58336e-09	5.4854e-08	1.42011e-06
Petalomonas marginalis	Euglenids	679.044	26		4.71502e-09	5.64297e-08	1.4609e-06
Ploeotia vitrea	Euglenids	1763.19	69		4.95896e-09	5.93493e-08	1.53649e-06
Notosolenus alatellus	Euglenids	551.351	22.8		5.06058e-09	6.05655e-08	1.56797e-06
Dinematomonas valida	Unclear (Excavata)	2767.36	111		5.15194e-09	6.16588e-08	1.59628e-06
Petalomonas boadicea	Euglenids	230.908	10		5.16316e-09	6.17932e-08	1.59976e-06
Ploeotia costata	Euglenids	1456.55	63		5.44963e-09	6.52216e-08	1.68852e-06
Notosolenus ostium	Euglenids	1691.23	75		5.61249e-09	6.71708e-08	1.73898e-06
Ploeotia oblonga	Euglenids	1960.36	87		5.64163e-09	6.75195e-08	1.74801e-06
Anisonema prosgeobium	Euglenids	2822.2	125.5		5.7151e-09	6.83988e-08	1.77077e-06
Notosolenus similis	Euglenids	614.968	29.25		5.83969e-09	6.98899e-08	1.80937e-06
Anisonema glaciale	Euglenids	2576.5	121.5		6.04404e-09	7.23355e-08	1.87269e-06
Notosolenus scutulum	Euglenids	636.174	35		6.76161e-09	8.09235e-08	2.09502e-06
Polytoma uvella	Chlorophyta	1393.82	78		7.04148e-09	8.4273e-08	2.18174e-06
Trachelocerca ditis	Ciliates	321050	15603		7.19918e-09	8.61604e-08	2.2306e-06
Ploeotia adhaerens	Euglenids	906.666	58		7.94612e-09	9.50998e-08	2.46203e-06
Notosolenus canellatus	Euglenids	624.197	41.25		8.11733e-09	9.71488e-08	2.51508e-06
Idionectes vortex	Unclear	502.656	36		8.74018e-09	1.04603e-07	2.70806e-06
Rhodelphis limneticus	Rhodophyta	385.37	28.75		9.03207e-09	1.08097e-07	2.7985e-06
Petalomonas abscissa	Euglenids	348.188	26.25		9.09956e-09	1.08904e-07	2.81941e-06
Nolandia sinica	Ciliates	38484.6	2612		9.43399e-09	1.12907e-07	2.92303e-06
Ploeotia pseudanisonema	Euglenids	1027.65	83.5		1.01309e-08	1.21247e-07	3.13895e-06
Dysnectes brevis	Metamonada	240.324	20.65		1.02565e-08	1.2275e-07	3.17786e-06
Peranema fusiforme	Euglenids	404.468	35.5		1.06415e-08	1.27358e-07	3.29716e-06
Acavomonas peruviana	Colponemida	385.37	34.5		1.08385e-08	1.29716e-07	3.3582e-06
Notosolenus navicula	Euglenids	435.635	39		1.08784e-08	1.30194e-07	3.37058e-06
Ploeotia longifilum	Euglenids	1013.69	91.5		1.12498e-08	1.34638e-07	3.48564e-06
Pseudoperanema (Peranema) trichophorum	Euglenids	510.342	49		1.17225e-08	1.40296e-07	3.63211e-06
Rhodelphis marinus	Rhodophyta	345.936	34		1.18605e-08	1.41948e-07	3.67487e-06
Kipferlia bialata	Metamonada	285.375	32.5		1.36641e-08	1.63533e-07	4.23369e-06
Colponema vietnamica	Colponemida	216.394	25.1		1.38018e-08	1.65181e-07	4.27636e-06
Goniomonas amphinema	Cryptista	85.085	10.75		1.46185e-08	1.74955e-07	4.52939e-06
Pseudoperanema dolichonema	Euglenids	619.419	75		1.48692e-08	1.77956e-07	4.60708e-06
Tiarina fusa	Ciliates	28634.4	3097.5		1.49033e-08	1.78363e-07	4.61763e-06
Bodo saltans	Kinetoplastea	143.794	20		1.63483e-08	1.95658e-07	5.06537e-06
Trimastix convexa	Preaxostyla	670.208	90		1.65299e-08	1.97831e-07	5.12163e-06
Mastigella simplex	Amorphea	121.88	17.5		1.67932e-08	2.00982e-07	5.20321e-06
Parafurgasonia zhangi	Ciliates	9081.19	1176		1.72369e-08	2.06293e-07	5.3407e-06
Notosolenus apocamptus	Euglenids	216.77	31.65		1.73742e-08	2.07936e-07	5.38323e-06
Ploeotia azurina	Euglenids	346.361	50.5		1.75954e-08	2.10583e-07	5.45176e-06
Mastigamoeba psammobia	Amorphea	239.563	36		1.79356e-08	2.14655e-07	5.55717e-06
Codonosiga botrytis	Choanoflagellata	196.35	30		1.81273e-08	2.16949e-07	5.61656e-06
Monas stigmata	Unclear	113.098	18		1.85726e-08	2.22279e-07	5.75455e-06
Breviata anathema	Amorphea	92.0391	15		1.89012e-08	2.26211e-07	5.85635e-06
Ploeotia decipiens	Euglenids	314.317	54		2.06727e-08	2.47413e-07	6.40524e-06
Ciliophrys infusionum	Ochrophyta	75.7666	14		2.13052e-08	2.54982e-07	6.60121e-06
Goniomonas pacifica	Cryptista	41.888	8		2.16329e-08	2.58904e-07	6.70273e-06
Trypanosoma brucei	Kinetoplastea	160.352	30		2.20622e-08	2.64042e-07	6.83576e-06
Cafeteria marsupialis	Opalozoa	104.689	20		2.22421e-08	2.66195e-07	6.8915e-06
Ploeotia tenuis	Euglenids	282.744	54		2.29083e-08	2.74169e-07	7.09792e-06
Pyramimonas octopus	Chlorophyta	731.175	136		2.29556e-08	2.74735e-07	7.11258e-06
Anisonema trepidum	Euglenids	372.018	71		2.30814e-08	2.7624e-07	7.15155e-06
Tritrichomonas foetus	Parabasalids	343.164	65.9		2.31686e-08	2.77283e-07	7.17856e-06
Pachyjoenia howa	Parabasalids	441787	70200		2.37646e-08	2.84417e-07	7.36324e-06
Palustrimonas yorkeensis	Colponemida	180.621	36.5		2.39154e-08	2.86222e-07	7.40997e-06
Heteronema globuliferum	Euglenids	348.718	70		2.42298e-08	2.89984e-07	7.50736e-06
Colponema marisrubri	Colponemida	162.357	33.75		2.45227e-08	2.9349e-07	7.59812e-06
Colpodella pugnax	Colpodellida	169.717	37.5		2.61005e-08	3.12373e-07	8.08698e-06
Ploeotia corrugata	Euglenids	197.986	44		2.63735e-08	3.1564e-07	8.17157e-06
Glissandra innuerende	CRuMs	143.794	32.5		2.6566e-08	3.17944e-07	8.23123e-06
Paramecium tetraurelia	Ciliates	233735	44000		2.76211e-08	3.30572e-07	8.55814e-06
Hicanonectes teleskopos	Metamonada	149.718	36.15		2.84147e-08	3.40069e-07	8.80402e-06
Hemimastix kukwesjijk	Hemimastigophora	939.12	216		2.85999e-08	3.42286e-07	8.86142e-06
Ancyromonas melba	Ancyromonadida	60.8214	15.3		2.88143e-08	3.44852e-07	8.92783e-06
Ancoracysta twista	Unclear	87.9648	22		2.89664e-08	3.46672e-07	8.97495e-06
Ergobibamus cyprinoides	Metamonada	117.81	29.25		2.90088e-08	3.4718e-07	8.9881e-06
Colponema symmetricum	Colponemida	257.36	65.25		3.03254e-08	3.62937e-07	9.39604e-06
Tracheloraphis dragescoi	Ciliates	486913	98498		3.03424e-08	3.63141e-07	9.40132e-06
Pseudobodo tremulans	Opalozoa	65.45	17.5		3.06942e-08	3.67351e-07	9.51031e-06
Rhynchomonas nasuta	Kinetoplastea	57.7269	16		3.16981e-08	3.79366e-07	9.82137e-06
Petalomonas minuta	Euglenids	26.3894	7.5		3.17486e-08	3.7997e-07	9.837e-06
Polytomella agilis	Chlorophyta	123.202	34		3.22872e-08	3.86416e-07	1.00039e-05
Psammosa pacifica	Perkinsidae	79.5217	22.5		3.2671e-08	3.91009e-07	1.01228e-05
Colpodella unguis	Colpodellida	74.8146	21.5		3.31225e-08	3.96412e-07	1.02627e-05
Trypanosoma cruzi	Kinetoplastea	41.888	12.4		3.35309e-08	4.01301e-07	1.03892e-05
Bicosoeca conica	Opalozoa	27.6117	8.5		3.44357e-08	4.1213e-07	1.06696e-05
Notosolenus apocamptus	Euglenids	88.0172	27.5		3.6187e-08	4.3309e-07	1.12122e-05
Hoplonympha natator	Parabasalids	7330.4	2025		3.65344e-08	4.37247e-07	1.13198e-05
Cafeteria ligulifera	Opalozoa	87.1139	27.5		3.65509e-08	4.37445e-07	1.1325e-05
Joenopsis intermedia	Parabasalids	530145	130000		3.68749e-08	4.41322e-07	1.14253e-05
Pleurostomum flabellatum	Heterolobosea	80.1762	26.5		3.81744e-08	4.56875e-07	1.1828e-05
Hemimastix amphikineta	Hemimastigophora	643.112	204		3.89981e-08	4.66732e-07	1.20832e-05
Bodo cygnus	Kinetoplastea	88.0172	30		3.94768e-08	4.72461e-07	1.22315e-05
Caecitellus parvulus	Opalozoa	50.9651	19.3		4.31473e-08	5.1639e-07	1.33688e-05
Ploeotia punctata	Euglenids	133.531	50.5		4.43534e-08	5.30826e-07	1.37425e-05
Ploeotia heracleum	Euglenids	109.956	42		4.45367e-08	5.33019e-07	1.37993e-05
Tetrahymena thermophila	Ciliates	12365.3	4125		4.48162e-08	5.36364e-07	1.38859e-05
Iotanema spirale	Metamonada	76.3278	30		4.53283e-08	5.42493e-07	1.40446e-05
Rhynchobodo simius	Kinetoplastea	87.9648	34.75		4.57537e-08	5.47584e-07	1.41763e-05
Petalomonas minor	Euglenids	19.0067	8		4.65588e-08	5.5722e-07	1.44258e-05
Helkesimastix marina	Cercozoa	29.4525	12.5		4.75677e-08	5.69294e-07	1.47384e-05
Spironema goodeyi	Hemimastigophora	293.216	120		4.91428e-08	5.88145e-07	1.52264e-05
Petalomonas pusilla	Euglenids	16.3625	7.5		5.04752e-08	6.04091e-07	1.56393e-05
Cafeteria roenbergensis	Opalozoa	24.2335	11		5.05778e-08	6.05319e-07	1.5671e-05
Colponema edaphicum	Colponemida	64.141	30		5.366e-08	6.42207e-07	1.6626e-05
Developayella elegans	Gyrista	50.2656	24.6		5.57382e-08	6.6708e-07	1.727e-05
Cyanophora cuspidata	Glaucophyta	21.7785	11		5.60992e-08	6.714e-07	1.73818e-05
Uronemella sinensis	Ciliates	4810.57	2115		5.74156e-08	6.87155e-07	1.77897e-05
Bordnamonas tropicana	Kinetoplastea	47.124	24		5.78918e-08	6.92854e-07	1.79372e-05
Stereonema geiseri	Hemimastigophora	553.053	264		5.84213e-08	6.99191e-07	1.81013e-05
Bodo designis	Kinetoplastea	70.5551	36		5.87058e-08	7.02596e-07	1.81894e-05
Monocercomonoides melolonthae POTCUPRI	Preaxostyla	122.485	63.9		6.10256e-08	7.3036e-07	1.89082e-05
Chilodonella acuta	Ciliates	5647.7	2655		6.16879e-08	7.38286e-07	1.91134e-05
Eucomonympha imla	Parabasalids	994372	416000		6.41094e-08	7.67267e-07	1.98637e-05
Holomastigotes lanceolata	Parabasalids	18849.6	8928		6.44409e-08	7.71235e-07	1.99664e-05
Cafeteria minuta	Opalozoa	27.6117	16		6.48202e-08	7.75773e-07	2.00839e-05
Strigomonas oncopelti	Kinetoplastea	29.0242	17		6.56179e-08	7.85321e-07	2.03311e-05
Cafeteria ligulifera	Opalozoa	33.5104	20		6.71516e-08	8.03676e-07	2.08063e-05
Pseudobodo tremulans	Opalozoa	33.5104	20		6.71516e-08	8.03676e-07	2.08063e-05
Eurystomatella sinica	Ciliates	17504.4	8700		6.74712e-08	8.07501e-07	2.09053e-05
Cafeteria roenbergensis	Opalozoa	18.4726	11.5		6.88044e-08	8.23457e-07	2.13184e-05
Carpediemonas membranifera	Metamonada	67.0208	41		7.02767e-08	8.41077e-07	2.17746e-05
Spironema terricola	Hemimastigophora	256.564	160		7.45849e-08	8.92638e-07	2.31094e-05
Metanophrys orientalis	Ciliates	5026.56	2940		7.64831e-08	9.15356e-07	2.36976e-05
Pleurostomum turgidum	Heterolobosea	66.0129	47		8.1754e-08	9.78439e-07	2.53307e-05
Halocafeteria	Opalozoa	23.562	18		8.50506e-08	1.01789e-06	2.63521e-05
Paramecium caudatum	Ciliates	291943	169704		8.58627e-08	1.02761e-06	2.66037e-05
Stephanopogon minuta	Heterolobosea	2099.21	1433.6		8.69931e-08	1.04114e-06	2.6954e-05
Monocercomonoides merkovicensis sp. nov. VAV1B	Preaxostyla	103.824	77.7		8.71093e-08	1.04253e-06	2.699e-05
Cthulhu macrofasciculumque	Parabasalids	881.269	620		8.73147e-08	1.04499e-06	2.70536e-05
Bodo platyrhynchus	Kinetoplastea	25.9182	20.35		8.76634e-08	1.04916e-06	2.71617e-05
Monocercomonoides communis sp. nov. BAT1	Preaxostyla	87.703	67		8.84711e-08	1.05883e-06	2.74119e-05
Opalina ranarum	Ciliates*	2.29881e+06	1505055		1.02883e-07	1.23132e-06	3.18774e-05
Spironema multiciliatum	Hemimastigophora	52.36	47.5		1.03446e-07	1.23805e-06	3.20518e-05
Monocercomonoides sp. MURAL 1	Preaxostyla	62.5571	58.9		1.07939e-07	1.29182e-06	3.34438e-05
Monocercomonoides merkovicensis sp. nov. MAREK 2	Preaxostyla	86.7443	86.3		1.15178e-07	1.37846e-06	3.56867e-05
Monocercomonoides sp. OEV	Preaxostyla	66.9035	68.8		1.18128e-07	1.41377e-06	3.66009e-05
Blattamonas junai gen. et sp. nov. Z98GC	Preaxostyla	41.5843	49.8		1.35618e-07	1.62309e-06	4.20201e-05
Blattamonas nauphoetae gen. et sp. nov. Z17NC	Preaxostyla	38.6794	49.2		1.43734e-07	1.72023e-06	4.45347e-05
Fusiforma themisticola	Ciliates	10601.5	11947.5		1.50702e-07	1.80362e-06	4.66936e-05
Blattamonas varadinovae gen. et sp. Nov. Z31SE	Preaxostyla	33.0716	45.2		1.53715e-07	1.83968e-06	4.76272e-05
Monocercomonoides exilis PA203	Preaxostyla	37.2018	52.5		1.59281e-07	1.90629e-06	4.93516e-05
Monocercomonoides communis sp. nov. Z30BD_1	Preaxostyla	45.4652	65.7		1.64084e-07	1.96378e-06	5.084e-05
Monocercomonoides sp. LEI	Preaxostyla	38.6794	56.2		1.64184e-07	1.96497e-06	5.0871e-05
Bodo saliens	Kinetoplastea	22.5312	33.5		1.65309e-07	1.97843e-06	5.12193e-05
Monocercomonoides acer sp. nov. TENE79	Preaxostyla	42.3404	61.9		1.65649e-07	1.9825e-06	5.13248e-05
Blattamonas nauphoetae gen. et sp. nov. NAU3	Preaxostyla	32.0799	47.3		1.65678e-07	1.98285e-06	5.13338e-05
Ochromonas malhamensis	Ochrophyta	14.1372	23.1		1.79147e-07	2.14405e-06	5.55071e-05
Monocercomonoides sp. B1-10	Preaxostyla	32.5014	52.1		1.80195e-07	2.15659e-06	5.58318e-05
Pleurostomum flabellatum	Heterolobosea	25.1328	43		1.90847e-07	2.28407e-06	5.91322e-05
Monocercomonoides exilis CAVIA-M	Preaxostyla	27.1717	47.4		1.95045e-07	2.33432e-06	6.0433e-05
Monocercomonoides sp. CYRT	Preaxostyla	35.919	67		2.10311e-07	2.51702e-06	6.51628e-05
Chromera velia	Colpodellida	11.404	24.5		2.3403e-07	2.80089e-06	7.25119e-05
Picomonas judraskeda	Picozoa	8.34978	21		2.71422e-07	3.2484e-06	8.40975e-05
Opisthomitus longiflagellatus	Preaxostyla	47.124	180		4.34189e-07	5.19641e-06	0.000134529
