# Supplementary material for: Flagellar energy costs across the tree of life
Source: eLife. 2022 Jul 26;11:e77266. doi: 10.7554/eLife.77266 (PMC9323006; doi:10.7554/eLife.77266)
Supplement: Figure 4—source data 1. [file elife-77266-fig4-data1.xlsx]

## Sheet: Fig4A
For references see Figure 1-source data 1.
Bacteria
Species	Cell construction cost (ATP)
Bacillus alcalophilus	2.88614e+10
Bacillus clausii	2.1462e+10
Bacillus halodurans	2.13647e+10
Bacillus megaterium	1.13745e+11
Bacillus pseudofirmus	4.35501e+10
Bdellovibrio bacteriovorus	1.8889e+09
Borrelia burgdorferi	3.4036e+10
Caulobacter crescentus	2.45366e+10
Clostridium tetani	3.07082e+10
Cristispira balbiannii	5.68569e+12
Escherichia coli	1.54577e+10
Escherichia coli	1.13745e+11
Leptospira interrogans	4.99995e+09
Photobacterium phosphoreum	2.44299e+10
Proteus mirabilis	1.04254e+10
Proteus mirabilis	4.53476e+11
Pseudomonas aeruginosa	7.33678e+09
Salmonella typhimurium	1.3319e+10
Salmonella typhosa	2.05673e+10
Sarcina ureae	1.08019e+11
Selenomonas ruminantium	1.67467e+12
Serratia marcescens	4.6506e+09
Spirillum serpens	5.51446e+10
Spirillum volutans	7.72582e+11
Spirochaeta litoralis	5.38495e+10
Treponema denticola	1.25104e+10
Treponema primitia	1.62331e+10
Vibrio alginolyticus	3.54929e+10
Vibrio cholera	1.24953e+10
Eukaryotes
Species	Flagellar construction cost (ATP)
Acavomonas peruviana	9.63279e+10
Anaeramoeba gargantua sp. nov., strain SIPEK1	3.35054e+11
Anaeramoeba ignava sp. nov., strain BMAN	8.93476e+10
Ancoracysta twista	6.14265e+10
Ancyromonas melba	4.27193e+10
Anisonema acinus	5.91928e+11
Anisonema glaciale	6.78484e+11
Anisonema prosgeobium	7.0082e+11
Anisonema trepidum	3.9648e+11
Apocoleps caoi	9.23073e+12
Auranticordis quadriverberis	6.14265e+11
Bicosoeca conica	2.3733e+10
Blattamonas junai gen. et sp. nov. Z98GC	1.39047e+11
Blattamonas nauphoetae gen. et sp. nov. NAU3	1.32067e+11
Blattamonas nauphoetae gen. et sp. nov. Z17NC	1.37372e+11
Blattamonas varadinovae gen. et sp. Nov. Z31SE	1.26204e+11
Bodo cygnus	1.67527e+11
Bodo designis	2.01032e+11
Bodo platyrhynchus	1.13639e+11
Bodo saliens	1.87072e+11
Bodo saltans	1.11685e+11
Bordnamonas tropicana	1.34021e+11
Breviata anathema	4.18817e+10
Caecitellus parvulus	5.38878e+10
Cafeteria ligulifera	7.67831e+10
Cafeteria ligulifera	5.58423e+10
Cafeteria marsupialis	5.58423e+10
Cafeteria minuta	4.46738e+10
Cafeteria roenbergensis	3.07132e+10
Cafeteria roenbergensis	3.21093e+10
Carpediemonas membranifera	1.14477e+11
Ceratium fusus	2.23369e+12
Chilodonella acuta	7.41306e+12
Chlamydomonas sp.	3.51806e+10
Chromera velia	6.84068e+10
Ciliophrys infusionum	3.90896e+10
Codonosiga botrytis	8.37634e+10
Colpodella pugnax	1.04704e+11
Colpodella unguis	6.00304e+10
Colponema edaphicum	8.37634e+10
Colponema globosum	1.20061e+11
Colponema loxodes	1.64735e+11
Colponema marisrubri	9.42338e+10
Colponema symmetricum	1.82185e+11
Colponema vietnamica	7.0082e+10
Cthulhu macrofasciculumque	1.73111e+12
Cyanophora cuspidata	3.07132e+10
Developayella elegans	6.8686e+10
Dinema validum	6.81276e+11
Dinematomonas inaequalis	1.95448e+11
Dinematomonas litoralis	3.92292e+11
Dinematomonas maculata	1.73111e+11
Dinematomonas valida	3.09925e+11
Dinophysis acuta	7.25949e+11
Diplonema ambulator	3.90896e+10
Dolium sedentarium	2.42914e+11
Dysnectes brevis	5.76571e+10
Ergobibamus cyprinoides	8.16693e+10
Eucomonympha imla	1.16152e+15
Euglena gracilis	2.5129e+11
Euglena viridis	4.02064e+11
Eurystomatella sinica	2.42914e+13
Fusiforma themisticola	3.33588e+13
Glissandra innuerende	9.07437e+10
Goniomonas amphinema	3.00152e+10
Goniomonas pacifica	2.23369e+10
Halocafeteria	5.0258e+10
Helkesimastix marina	3.49014e+10
Hemimastix amphikineta	5.69591e+11
Hemimastix kukwesjijk	6.03097e+11
Heteronema exaratum	1.95448e+11
Heteronema globuliferum	3.90896e+11
Heteronema splendens	9.26982e+11
Heteronema vittatum	5.0258e+11
Hicanonectes teleskopos	1.00935e+11
Holomastigotes lanceolata	2.4928e+13
Hoplonympha natator	5.65403e+12
Idionectes vortex	1.00516e+11
Iotanema spirale	8.37634e+10
Joenopsis intermedia	3.62975e+14
Kipferlia bialata	9.07437e+10
Kovalevaia sulcata	1.40304e+13
Mastigamoeba psammobia	1.00516e+11
Mastigella simplex	4.8862e+10
Menoidium cultellus	1.17269e+11
Metanophrys orientalis	8.20881e+12
Monas stigmata	5.0258e+10
Monocercomonoides acer sp. nov. TENE79	1.72832e+11
Monocercomonoides communis sp. nov. BAT1	1.87072e+11
Monocercomonoides communis sp. nov. Z30BD_1	1.83442e+11
Monocercomonoides exilis CAVIA-M	1.32346e+11
Monocercomonoides exilis PA203	1.46586e+11
Monocercomonoides melolonthae POTCUPRI	1.78416e+11
Monocercomonoides merkovicensis sp. nov. MAREK 2	2.40959e+11
Monocercomonoides merkovicensis sp. nov. VAV1B	2.16947e+11
Monocercomonoides sp. B1-10	1.45469e+11
Monocercomonoides sp. CYRT	1.87072e+11
Monocercomonoides sp. LEI	1.56917e+11
Monocercomonoides sp. MURAL 1	1.64455e+11
Monocercomonoides sp. OEV	1.92097e+11
Nolandia sinica	7.293e+12
Notosolenus alatellus	1.2732e+11
Notosolenus apocamptus	1.53566e+11
Notosolenus apocamptus	1.76741e+11
Notosolenus canellatus	2.30349e+11
Notosolenus esulcis	1.67527e+11
Notosolenus navicula	2.17785e+11
Notosolenus ostium	4.18817e+11
Notosolenus ostium	2.79211e+11
Notosolenus scutulum	1.95448e+11
Notosolenus similis	1.63339e+11
Notosolenus tamanduensis	2.17785e+11
Notosolenus triangularis	2.84796e+11
Notosolenus urceolatus	1.89864e+11
Ochromonas malhamensis	6.44978e+10
Opalina ranarum	4202284294341074
Opisthomitus longiflagellatus	5.0258e+11
Pachyjoenia howa	1.96006e+14
Palustrimonas yorkeensis	1.01912e+11
Parafurgasonia zhangi	3.28353e+12
Paramecium caudatum	4.73833e+14
Paramecium tetraurelia	1.22853e+14
Peranema fusiforme	1.9824e+11
Peranema trichophorum	4.46738e+11
Peranema trichophorum	4.41154e+11
Petalomonas abscissa	1.46586e+11
Petalomonas boadicea	5.58423e+10
Petalomonas marginalis	1.4519e+11
Petalomonas minor	4.46738e+10
Petalomonas minuta	4.18817e+10
Petalomonas pusilla	4.18817e+10
Picomonas judraskeda	5.86344e+10
Pleurostomum flabellatum	1.20061e+11
Pleurostomum flabellatum	7.3991e+10
Pleurostomum turgidum	1.31229e+11
Ploeotia adhaerens	3.23885e+11
Ploeotia azurina	2.82003e+11
Ploeotia corrugata	2.45706e+11
Ploeotia costata	3.51806e+11
Ploeotia decipiens	3.01548e+11
Ploeotia heracleum	2.34538e+11
Ploeotia longifilum	5.10957e+11
Ploeotia oblonga	4.85828e+11
Ploeotia pseudanisonema	4.66283e+11
Ploeotia punctata	2.82003e+11
Ploeotia tenuis	3.01548e+11
Ploeotia vitrea	3.85312e+11
Polytoma uvella	2.17785e+11
Polytomella agilis	9.49319e+10
Psammosa pacifica	6.28226e+10
Pseudobodo tremulans	4.8862e+10
Pseudobodo tremulans	5.58423e+10
Pseudoperanema (Peranema) fusiforme	6.75691e+11
Pseudoperanema (Peranema) trichophorum	2.73627e+11
Pseudoperanema dolichonema	4.18817e+11
Pyramimonas octopus	3.79727e+11
Rhabdomonas spiralis	1.50774e+11
Rhodelphis limneticus	8.02733e+10
Rhodelphis marinus	9.49319e+10
Rhynchobodo simius	1.94052e+11
Rhynchomonas nasuta	8.93476e+10
Spironema goodeyi	3.35054e+11
Spironema multiciliatum	1.32625e+11
Spironema terricola	4.46738e+11
Stephanopogon minuta	4.00277e+12
Stereonema geiseri	7.37118e+11
Strigomonas oncopelti	9.49319e+10
Tetrahymena thermophila	1.15175e+13
Tiarina fusa	8.64857e+12
Trachelocerca ditis	4.35653e+13
Tracheloraphis dragescoi	2.75018e+14
Trimastix convexa	2.5129e+11
Tritrichomonas foetus	1.84e+11
Trypanosoma brucei	1.67527e+11
Trypanosoma cruzi	6.92444e+10
Urceolus cornutus	1.67527e+11
Urceolus cristatus	2.31745e+11
Uronemella sinensis	5.90532e+12

## Sheet: Fig4B
For references see Figure 1-source data 1.
Bacteria
Species	Total length of eukaryotic flagellum on bacterium (µm)
Pseudomonas aeruginosa	0.0433242
Photobacterium phosphoreum	0.0649864
Caulobacter crescentus	0.0660695
Bacillus pseudofirmus	0.0671526
Leptospira interrogans	0.0909809
Treponema primitia	0.108311
Vibrio cholera	0.13943
Serratia marcescens	0.155967
Sarcina ureae	0.173297
Proteus mirabilis	0.176005
Bdellovibrio bacteriovorus	0.182332
Escherichia coli	0.206223
Bacillus alcalophilus	0.217704
Vibrio alginolyticus	0.257946
Treponema denticola	0.259945
Salmonella typhimurium	0.302512
Spirochaeta litoralis	0.506894
Escherichia coli	0.604373
Spirillum serpens	0.727847
Salmonella typhosa	0.740844
Bacillus clausii	0.779836
Clostridium tetani	1.52718
Bacillus halodurans	2.45648
Borrelia burgdorferi	2.63195
Selenomonas ruminantium	3.79087
Bacillus megaterium	6.90155
Spirillum volutans	16.4578
Cristispira balbiannii	22.7452
Proteus mirabilis	156.373
Eukaryotes
Species	Total flagellar length (µm)
Diplonema ambulator	7
Petalomonas minuta	7.5
Petalomonas pusilla	7.5
Goniomonas pacifica	8
Petalomonas minor	8
Bicosoeca conica	8.5
Petalomonas boadicea	10
Goniomonas amphinema	10.75
Cyanophora cuspidata	11
Cafeteria roenbergensis	11
Cafeteria roenbergensis	11.5
Trypanosoma cruzi	12.4
Helkesimastix marina	12.5
Chlamydomonas sp.	12.6
Ciliophrys infusionum	14
Breviata anathema	15
Ancyromonas melba	15.3
Rhynchomonas nasuta	16
Cafeteria minuta	16
Strigomonas oncopelti	17
Mastigella simplex	17.5
Pseudobodo tremulans	17.5
Halocafeteria	18
Monas stigmata	18
Caecitellus parvulus	19.3
Bodo saltans	20
Cafeteria ligulifera	20
Cafeteria marsupialis	20
Pseudobodo tremulans	20
Bodo platyrhynchus	20.35
Dysnectes brevis	20.65
Menoidium cultellus	21
Picomonas judraskeda	21
Colpodella unguis	21.5
Ancoracysta twista	22
Psammosa pacifica	22.5
Notosolenus alatellus	22.8
Ochromonas malhamensis	23.1
Bordnamonas tropicana	24
Chromera velia	24.5
Developayella elegans	24.6
Colponema vietnamica	25.1
Petalomonas marginalis	26
Petalomonas abscissa	26.25
Pleurostomum flabellatum	26.5
Rhabdomonas spiralis	27
Notosolenus apocamptus	27.5
Cafeteria ligulifera	27.5
Rhodelphis limneticus	28.75
Notosolenus similis	29.25
Ergobibamus cyprinoides	29.25
Codonosiga botrytis	30
Colponema edaphicum	30
Urceolus cornutus	30
Notosolenus esulcis	30
Bodo cygnus	30
Trypanosoma brucei	30
Iotanema spirale	30
Notosolenus apocamptus	31.65
Anaeramoeba ignava sp. nov., strain BMAN	32
Glissandra innuerende	32.5
Kipferlia bialata	32.5
Bodo saliens	33.5
Colponema marisrubri	33.75
Polytomella agilis	34
Notosolenus urceolatus	34
Rhodelphis marinus	34
Acavomonas peruviana	34.5
Rhynchobodo simius	34.75
Heteronema exaratum	35
Notosolenus scutulum	35
Peranema fusiforme	35.5
Mastigamoeba psammobia	36
Bodo designis	36
Idionectes vortex	36
Hicanonectes teleskopos	36.15
Palustrimonas yorkeensis	36.5
Colpodella pugnax	37.5
Notosolenus navicula	39
Notosolenus tamanduensis	39
Carpediemonas membranifera	41
Notosolenus canellatus	41.25
Urceolus cristatus	41.5
Ploeotia heracleum	42
Colponema globosum	43
Pleurostomum flabellatum	43
Dolium sedentarium	43.5
Ploeotia corrugata	44
Euglena gracilis	45
Blattamonas varadinovae gen. et sp. Nov. Z31SE	45.2
Pleurostomum turgidum	47
Blattamonas nauphoetae gen. et sp. nov. NAU3	47.3
Monocercomonoides exilis CAVIA-M	47.4
Spironema multiciliatum	47.5
Pseudoperanema (Peranema) trichophorum	49
Blattamonas nauphoetae gen. et sp. nov. Z17NC	49.2
Blattamonas junai gen. et sp. nov. Z98GC	49.8
Notosolenus ostium	50
Ploeotia azurina	50.5
Ploeotia punctata	50.5
Notosolenus triangularis	51
Monocercomonoides sp. B1-10	52.1
Monocercomonoides exilis PA203	52.5
Ploeotia decipiens	54
Ploeotia tenuis	54
Monocercomonoides sp. LEI	56.2
Ploeotia adhaerens	58
Monocercomonoides sp. MURAL 1	58.9
Colponema loxodes	59
Monocercomonoides acer sp. nov. TENE79	61.9
Dinematomonas maculata	62
Ploeotia costata	63
Monocercomonoides melolonthae POTCUPRI	63.9
Colponema symmetricum	65.25
Monocercomonoides communis sp. nov. Z30BD_1	65.7
Tritrichomonas foetus	65.9
Monocercomonoides communis sp. nov. BAT1	67
Monocercomonoides sp. CYRT	67
Monocercomonoides sp. OEV	68.8
Ploeotia vitrea	69
Heteronema globuliferum	70
Dinematomonas inaequalis	70
Anisonema trepidum	71
Euglena viridis	72
Notosolenus ostium	75
Pseudoperanema dolichonema	75
Monocercomonoides merkovicensis sp. nov. VAV1B	77.7
Polytoma uvella	78
Peranema trichophorum	79
Peranema trichophorum	80
Ploeotia pseudanisonema	83.5
Monocercomonoides merkovicensis sp. nov. MAREK 2	86.3
Ploeotia oblonga	87
Heteronema vittatum	90
Trimastix convexa	90
Ploeotia longifilum	91.5
Anisonema acinus	106
Dinematomonas valida	111
Spironema goodeyi	120
Anaeramoeba gargantua sp. nov., strain SIPEK1	120
Pseudoperanema (Peranema) fusiforme	121
Anisonema glaciale	121.5
Dinema validum	122
Anisonema prosgeobium	125.5
Dinophysis acuta	130
Pyramimonas octopus	136
Dinematomonas litoralis	140.5
Spironema terricola	160
Heteronema splendens	166
Opisthomitus longiflagellatus	180
Hemimastix amphikineta	204
Hemimastix kukwesjijk	216
Auranticordis quadriverberis	220
Stereonema geiseri	264
Ceratium fusus	400
Cthulhu macrofasciculumque	620
Parafurgasonia zhangi	1176
Stephanopogon minuta	1433.6
Hoplonympha natator	2025
Uronemella sinensis	2115
Nolandia sinica	2612
Chilodonella acuta	2655
Metanophrys orientalis	2940
Tiarina fusa	3097.5
Apocoleps caoi	3306
Tetrahymena thermophila	4125
Kovalevaia sulcata	5025
Eurystomatella sinica	8700
Holomastigotes lanceolata	8928
Fusiforma themisticola	11947.5
Trachelocerca ditis	15603
Paramecium tetraurelia	44000
Pachyjoenia howa	70200
Tracheloraphis dragescoi	98498
Joenopsis intermedia	130000
Paramecium caudatum	169704
Eucomonympha imla	416000
Opalina ranarum	1505055
