# Supplementary material for: Flagellar energy costs across the tree of life
Source: eLife. 2022 Jul 26;11:e77266. doi: 10.7554/eLife.77266 (PMC9323006; doi:10.7554/eLife.77266)
Supplement: Table 1—source data 1. [file elife-77266-table1-data1.xlsx]

## Sheet: Bacteria
Proteins in the flagellum of Escherichia coli K-12 MG1655
Protein length (AA) obtained from KEGG (Escherichia coli K-12 MG1655, database T00007)
Protein name	Size (AA)	Copy number	Costs per subunit (ATP)	Costs total (ATP)	Comments	References
FliM	334	32	9686	309952		(Berg, 2003)
FliN	137	110	3973	437030		(Berg, 2003)
FliF	552	26	16008	416208		(Berg, 2003)
FliG	331	26	9599	249574		(Berg, 2003)
MotA	295	32	8555	273760		(Berg, 2003)
MotB	308	16	8932	142912		(Berg, 2003)
FlgG	260	26	7540	196040		(Berg, 2003)
FlgH	232	26	6728	174928		(Berg, 2003)
FlgI	365	26	10585	275210		(Berg, 2003)
FlgB	138	6	4002	24012		(Berg, 2003)
FlgC	134	6	3886	23316		(Berg, 2003)
FlgF	251	6	7279	43674		(Berg, 2003)
FlgE	402	130	11658	1515540		(Berg, 2003)
FlgK	547	11	15863	174493		(Berg, 2003)
FlgL	317	11	9193	101123		(Berg, 2003)
FliC	498	15702	14442	226768284	Filament; copy number per um is 2093.6; length of flagellum is 7.5 um	(Berg, 2003; Namba et al., 1989; Turner et al., 2000)
FliD	468	10	13572	135720		(Berg, 2003)
FlhA	692	9	20068	180612		(Berg, 2003; Fukumura et al., 2017)
FlhB	382	2	11078	22156		(Berg, 2003; Fukumura et al., 2017)
FliH	228	12	6612	79344		(Berg, 2003; Minamino, 2018)
FliI	457	6	13253	79518		(Berg, 2003; Minamino, 2014)
FliP	245	6	7105	42630		(Berg, 2003; Fukumura et al., 2017)
FliQ	89	2	2581	5162		(Berg, 2003; Fukumura et al., 2017)
FliR	261	2	7569	15138		(Berg, 2003; Fukumura et al., 2017)
FliJ	147	1	4263	4263		(Berg, 2003; Minamino, 2014)
			Total energy cost 1 flagellum (ATP)	231690599
			Fraction of energy cost in filament	0.987071
			Energy cost per µm filament	3.02358e+07
			Total energy cost 3.4 flagella (ATP)	7.87748e+08
References
Berg, H. C. (2003). The rotary motor of bacterial flagella. Annual Review of Biochemistry, 72, 19-54. https://doi.org/10.1146/annurev.biochem.72.121801.161737
Fukumura, T., Makino, F., Dietsche, T., Kinoshita, M., Kato, T., Wagner, S., . . . Minamino, T. (2017). Assembly and stoichiometry of the core structure of the bacterial flagellar type III export gate complex. Plos Biology, 15(8), Article e2002281. https://doi.org/10.1371/journal.pbio.2002281
Minamino, T. (2014). Protein export through the bacterial flagellar type III export pathway. Biochimica Et Biophysica Acta-Molecular Cell Research, 1843(8), 1642-1648. https://doi.org/10.1016/j.bbamcr.2013.09.005
Minamino, T. (2018). Hierarchical protein export mechanism of the bacterial flagellar type III protein export apparatus. Fems Microbiology Letters, 365(12), Article fny117. https://doi.org/10.1093/femsle/fny117
Namba, K., Yamashita, I., & Vonderviszt, F. (1989). Structure of the core and central channel of bacterial flagella. Nature, 342(6250), 648-654. https://doi.org/10.1038/342648a0
Turner, L., Ryu, W. S., & Berg, H. C. (2000). Real-time imaging of fluorescent flagellar filaments. Journal of Bacteriology, 182(10), 2793-2801. https://doi.org/10.1128/jb.182.10.2793-2801.2000

## Sheet: Archaea
Proteins in the flagellum of Pyrococcus furiosus DSM 3638
Protein length obtained from KEGG (Pyrococcus furiosus DSM 3638, database T00075)
Protein name	Size (AA)	Copy number	Costs per subunit (ATP)	Costs total (ATP)	Comments	References
FlaB0	207	3056	6913	21126128	Total length of the protein is 212 AA but the N-terminal 5 are removed before assembly into the filament; Taking an average archaellum length of 1.65 um, and 1852 archaellins per um	(Albers & Jarrell, 2018; Daum et al., 2017; Nather-Schindler et al., 2014)
FlaJ	568	2	16472	32944	Unclear what the number of subunits is; we took 2 from what is visible in the figure; we took the number of AA's in FlaJ from entry PF0330, there was another entry for FlaJ (PF0993, 355 AA's) but that was labelled hypothetical protein	(Albers & Jarrell, 2018; Daum et al., 2017)
FlaI	1150	6	33350	200100	Copy number from structure of Sulfolobus acidocaldarius FlaI; Two gene entries in KEGG PF0331 and PF0994 (537 and 1150 AA's)	(Albers & Jarrell, 2018; Daum et al., 2017)
FlaC	158	6	4582	27492	Copy number inferred from sixfold symmetry of cryoEM structure	(Albers & Jarrell, 2018; Daum et al., 2017)
FlaD/E	402	6	11658	69948	Copy number inferred from sixfold symmetry of cryoEM structure	(Albers & Jarrell, 2018; Daum et al., 2017)
FlaH	204	6	5916	35496	Copy number in Sulfolobus acidocaldarius structure	(Albers & Jarrell, 2018; Daum et al., 2017)
			Cost of archaellin glycosylation (ATP/protein)	910
			Total energy cost 1 flagellum (ATP)	21492108
			Fraction of energy cost in filament	0.982971
			Energy cost per µm filament	12802876
			Total energy cost 50 flagella (ATP)	1074605400
References
Albers, S. V., & Jarrell, K. F. (2018). The Archaellum: An Update on the Unique Archaeal Motility Structure. Trends in Microbiology, 26(4), 351-362. https://doi.org/10.1016/j.tim.2018.01.004
Daum, B., Vonck, J., Bellack, A., Chaudhury, P., Reichelt, R., Albers, S. V., . . . Kuhlbrandt, W. (2017). Structure and in situ organisation of the Pyrococcus furiosus archaellum machinery. Elife, 6, Article e27470. https://doi.org/10.7554/eLife.27470
Nather-Schindler, D. J., Schopf, S., Bellack, A., Rachel, R., & Wirth, R. (2014). Pyrococcus furiosus flagella: biochemical and transcriptional analyses identify the newly detected flaB0 gene to encode the major flagellin. Frontiers in Microbiology, 5, Article 695. https://doi.org/10.3389/fmicb.2014.00695

## Sheet: Eukaryota
Protein and protein complexes in the axoneme of Chlamydomonas reinhardtii
Cost of microtubule doublet
Protein name	Protein Mw (kDa)	Length (AA)	Copy number per 96 nm	Cost per subunit (ATP)	Cost per 96 nm (ATP)	Comments	References
Tubulin alpha		451	276	13079	3609804	Protein length from KEGG T01039; there are 13+10 = 23 protofilaments of tubulin in each microtubule doublet; per protofilament there are 12 tubulin alpha's and 12 tubulin beta's	(Ma et al., 2019)
Tubulin beta		443	276	12847	3545772	Protein length from KEGG T01039; there are 13+10 = 23 protofilaments of tubulin in each microtubule doublet; per protofilament there are 12 tubulin alpha's and 12 tubulin beta's	(Ma et al., 2019)
External proteins
CCDC39		925	1	26825	26825		(Ma et al., 2019)
CCDC40		903	1	26187	26187		(Ma et al., 2019)
Internal proteins
FAP20		190	12	5510	66120		(Ma et al., 2019)
FAP21		459	2	13311	26622		(Ma et al., 2019)
FAP45		501	4	14529	58116	Appears twice per 48 nm repeat	(Ma et al., 2019)
FAP52		633	6	18357	110142		(Ma et al., 2019)
FAP53		482	2	13978	27956		(Ma et al., 2019)
FAP67		380	4	11020	44080	Appears twice per 48 nm repeat	(Ma et al., 2019)
FAP68		312	2	9048	18096		(Ma et al., 2019)
FAP85		197	2	5713	11426		(Ma et al., 2019)
FAP90		242	6	7018	42108		(Ma et al., 2019)
FAP95		235	2	6815	13630		(Ma et al., 2019)
FAP106		240	6	6960	41760		(Ma et al., 2019)
FAP107		238	2	6902	13804		(Ma et al., 2019)
FAP112		475	2	13775	27550		(Ma et al., 2019)
FAP115		230	12	6670	80040		(Ma et al., 2019)
FAP126		137	6	3973	23838		(Ma et al., 2019)
FAP127		505	2	14645	29290		(Ma et al., 2019)
FAP129		496	2	14384	28768		(Ma et al., 2019)
FAP141		111	2	3219	6438		(Ma et al., 2019)
FAP143		268	2	7772	15544		(Ma et al., 2019)
FAP161		403	2	11687	23374		(Ma et al., 2019)
FAP166		220	2	6380	12760		(Ma et al., 2019)
FAP182		471	2	13659	27318		(Ma et al., 2019)
FAP210		456	2	13224	26448		(Ma et al., 2019)
FAP222		146	6	4234	25404		(Ma et al., 2019)
FAP252		352	12	10208	122496		(Ma et al., 2019)
FAP273		139	2	4031	8062		(Ma et al., 2019)
FAP276		85	6	2465	14790		(Ma et al., 2019)
FAP363		391	2	11339	22678		(Ma et al., 2019)
PACRG		307	11	8903	97933	One copy is missing so 11 rather than the 12 expected from periodicity	(Ma et al., 2019)
RIB21		189	2	5481	10962		(Ma et al., 2019)
RIB30		274	2	7946	15892		(Ma et al., 2019)
RIB43a		367	4	10643	42572	Appears twice per 48 nm repeat	(Ma et al., 2019)
RIB72		635	12	18415	220980		(Ma et al., 2019)
Radial spokes
RSP1	78.6	714.545	8	20721.8	165775	There are two masses mentioned for all RSP's, one from gel and the other theoretical. Theoretical values were used for all.	(Pigino et al., 2011)
RSP4	49.8	452.727	8	13129.1	105033	There are two masses mentioned for all RSP's, one from gel and the other theoretical. Theoretical values were used for all.	(Pigino et al., 2011)
RSP6	48.8	443.636	8	12865.5	102924	There are two masses mentioned for all RSP's, one from gel and the other theoretical. Theoretical values were used for all.	(Pigino et al., 2011)
RSP9	29.5	268.182	8	7777.27	62218.2	There are two masses mentioned for all RSP's, one from gel and the other theoretical. Theoretical values were used for all.	(Pigino et al., 2011)
RSP10	23.5	213.636	8	6195.45	49563.6	There are two masses mentioned for all RSP's, one from gel and the other theoretical. Theoretical values were used for all.	(Pigino et al., 2011)
RSP2	77.4	703.636	4	20405.5	81621.8	There are two masses mentioned for all RSP's, one from gel and the other theoretical. Theoretical values were used for all.	(Pigino et al., 2011)
RSP16	39	354.545	4	10281.8	41127.3	There are two masses mentioned for all RSP's, one from gel and the other theoretical. Theoretical values were used for all.	(Pigino et al., 2011)
RSP23	61	554.545	4	16081.8	64327.3	There are two masses mentioned for all RSP's, one from gel and the other theoretical. Theoretical values were used for all.	(Pigino et al., 2011)
RSP3	56.8	516.364	8	14974.5	119796	There are two masses mentioned for all RSP's, one from gel and the other theoretical. Theoretical values were used for all.	(Pigino et al., 2011)
RSP5	55.9	508.182	4	14737.3	58949.1	There are two masses mentioned for all RSP's, one from gel and the other theoretical. Theoretical values were used for all.	(Pigino et al., 2011)
RSP7	55	500	4	14500	58000	There are two masses mentioned for all RSP's, one from gel and the other theoretical. Theoretical values were used for all.	(Pigino et al., 2011)
RSP8	40.5	368.182	2	10677.3	21354.5	There are two masses mentioned for all RSP's, one from gel and the other theoretical. Theoretical values were used for all.	(Pigino et al., 2011)
RSP11	21.5	195.455	4	5668.18	22672.7	There are two masses mentioned for all RSP's, one from gel and the other theoretical. Theoretical values were used for all.	(Pigino et al., 2011)
RSP12	19.7	179.091	4	5193.64	20774.5	There are two masses mentioned for all RSP's, one from gel and the other theoretical. Theoretical values were used for all.	(Pigino et al., 2011)
RSP13	98	890.909	2	25836.4	51672.7	There are two masses mentioned for all RSP's, one from gel and the other theoretical. Theoretical values were used for all.	(Pigino et al., 2011)
RSP14	28.3	257.273	2	7460.91	14921.8	There are two masses mentioned for all RSP's, one from gel and the other theoretical. Theoretical values were used for all.	(Pigino et al., 2011)
RSP15	38	345.455	2	10018.2	20036.4	There are two masses mentioned for all RSP's, one from gel and the other theoretical. Theoretical values were used for all.	(Pigino et al., 2011)
RSP17	98.5	895.455	2	25968.2	51936.4	There are two masses mentioned for all RSP's, one from gel and the other theoretical. Theoretical values were used for all.	(Pigino et al., 2011)
RSP18	210	1909.09	2	55363.6	110727	There are two masses mentioned for all RSP's, one from gel and the other theoretical. Theoretical values were used for all.	(Pigino et al., 2011)
RSP19	140	1272.73	2	36909.1	73818.2	There are two masses mentioned for all RSP's, one from gel and the other theoretical. Theoretical values were used for all.	(Pigino et al., 2011)
RSP20	18.3	166.364	8	4824.55	38596.4	There are two masses mentioned for all RSP's, one from gel and the other theoretical. Theoretical values were used for all.	(Pigino et al., 2011)
RSP21	16	145.455	2	4218.18	8436.36	There are two masses mentioned for all RSP's, one from gel and the other theoretical. Theoretical values were used for all.	(Pigino et al., 2011)
RSP22	10.3	93.6364	4	2715.45	10861.8	There are two masses mentioned for all RSP's, one from gel and the other theoretical. Theoretical values were used for all.	(Pigino et al., 2011)
Third radial spoke (stub)
Radial spoke 3	950	8636.36	1	250455	250455	Proteins unknown; mass estimated from EM data 950 kDa; average mass per amino acid is 110 Da; number of amino acids is an estimate from these numbers	(Barber et al., 2012)
IC/LC complex
IC/LC complex	1300	11818.2	1	342727	342727	Mass estimated from EM data: 1.3 Mda; Number of amino acids calculated from IC/LC mass and average amino acid mass 110 Da	(Heuser et al., 2012)
CSC
Calmodulin		150	1	4350	4350	Protein copy number in 96 nm repeat is the minimal number, the stoichiometry of the proteins in the CSC is unknown but the number of CSC's per 96 nm is likely only one.	(Dymek & Smith, 2007; Pigino et al., 2011)
CaM-IP2/FAP91	183	1663.64	1	48245.5	48245.5	Apparent molecular mass from SDS-PAGE; protein copy number in 96 nm repeat is the minimal number, the stoichiometry of the proteins in the CSC is unknown but the number of CSC's per 96 nm is likely only one.	(Dymek & Smith, 2007; Pigino et al., 2011)
CaM-IP3/FAP61	118	1072.73	1	31109.1	31109.1	Predicted molecular mass; protein copy number in 96 nm repeat is the minimal number, the stoichiometry of the proteins in the CSC is unknown but the number of CSC's per 96 nm is likely only one.	(Dymek & Smith, 2007; Pigino et al., 2011)
CaM-IP4/FAP251	97	881.818	1	25572.7	25572.7	Predicted molecular mass; protein copy number in 96 nm repeat is the minimal number, the stoichiometry of the proteins in the CSC is unknown but the number of CSC's per 96 nm is likely only one.	(Dymek & Smith, 2007; Pigino et al., 2011)
Nexin-DRC
Nexin-DRC	1425	12954.5	1	375682	375682	The molecular mass was estimated between 1300-1550 kDa, the average of this is 1425 kDa.	(Heuser et al., 2009)
MIA complex
FAP73	35.6	308	2	8932	17864	Molecular weight taken from (Yamamoto, Song, …, Sale (2013) The MIA complex is a conserved and novel dynein regulator essential for normal ciliary motility); The number of amino acids taken from Phytozome - Chlamydomonas reinhardtii v5.5; Stoichiometry FAP100:FAP73 is 1:1.83-2.89	(Yamamoto et al., 2013)
FAP100	76	576	1	16704	16704	Molecular weight taken from (Yamamoto, Song, …, Sale (2013) The MIA complex is a conserved and novel dynein regulator essential for normal ciliary motility); The number of amino acids taken from Phytozome - Chlamydomonas reinhardtii v5.5;	(Yamamoto et al., 2013)
Tether
Tether + tether head	825	7500	1	217500	217500	Mass estimated from EM data	(Heuser et al., 2012)
Outer dynein arms
Heavy chain alpha	504	4581.82	4	132873	531491		(King, 2016)
Heavy chain beta	520	4727.27	4	137091	548364		(King, 2016)
Heavy chain gamma	513	4663.64	4	135245	540982		(King, 2016)
IC1	76	690.909	4	20036.4	80145.5		(King, 2016; King & Patel-King, 2015)
IC2	63	572.727	4	16609.1	66436.4		(King, 2016; King & Patel-King, 2015)
LC1	22	200	8	5800	46400		(King, 2016; King & Patel-King, 2015)
LC2	16	145.455	4	4218.18	16872.7		(King, 2016; King & Patel-King, 2015)
LC3	17	154.545	4	4481.82	17927.3		(King, 2016; King & Patel-King, 2015)
LC4	18	163.636	4	4745.45	18981.8		(King, 2016; King & Patel-King, 2015)
LC5	14	127.273	4	3690.91	14763.6		(King, 2016; King & Patel-King, 2015)
LC6	14	127.273	8	3690.91	29527.3		(King, 2016; King & Patel-King, 2015)
LC7a	12	109.091	4	3163.64	12654.5		(King, 2016; King & Patel-King, 2015)
LC7b	11	100	4	2900	11600		(King, 2016; King & Patel-King, 2015)
LC8	10	90.9091	8	2636.36	21090.9		(King, 2016; King & Patel-King, 2015)
LC9	13	118.182	8	3427.27	27418.2		(King, 2016; King & Patel-King, 2015)
LC10	12	109.091	8	3163.64	25309.1		(King, 2016; King & Patel-King, 2015)
CCDC103	29	263.636	8	7645.45	61163.6		(King & Patel-King, 2015)
DC1		749	4	21721	86884		(Ma et al., 2019)
DC2		552	4	16008	64032		(Ma et al., 2019)
DC3		184	4	5336	21344		(Ma et al., 2019)
Inner dynein arms
Heavy chain 1 alpha	523	4754.55	1	137882	137882	Inner arm I1/f	(King, 2016)
Heavy chain 1 beta	510	4636.36	1	134455	134455	Inner arm I1/f	(King, 2016)
Dynein a		4309	1	124961	124961	Other names: IAD2, DHC6; protein length from Phytozome 12 - Chlamydomonas reinhardtii v5.5	(King, 2013, 2016)
Dynein b		4185	1	121365	121365	Other names: IADX, DHC5; protein length from Phytozome 12 - Chlamydomonas reinhardtii v5.5	(King, 2013, 2016)
Dynein c		4152	1	120408	120408	Other names: IAD3, DHC9; protein length from Phytozome 12 - Chlamydomonas reinhardtii v5.5	(King, 2013, 2016)
Dynein d		4165	1	120785	120785	Other names: IAD6, DHC2; protein length from Phytozome 12 - Chlamydomonas reinhardtii v5.5	(King, 2013, 2016)
Dynein e		4209	1	122061	122061	Other names: IAD4, DHC8; protein length from Phytozome 12 - Chlamydomonas reinhardtii v5.5	(King, 2013, 2016)
Dynein g		3540	1	102660	102660	Other names: IAD5, DHC7; protein length from KEGG T01039	(King, 2013, 2016)
				Cost single microtubule doublet per 96 nm (ATP)	1.44789e+07
				Cost all 9 doublets per 96 nm (ATP)	1.3031e+08
Central pair
Protein name	Protein Mw (kDa)	Length (AA)	Copy number per 96 nm	Cost per subunit (ATP)	Cost per 96 nm (ATP)	Comments	References
Tubulin alpha		451	312	13079	4080648	Protein length from KEGG T01039; I assume 13 tubulin protofilaments per microtubule; per protofilament there are 12 tubulin alpha's and 12 tubulin beta's	(Carbajal-Gonzalez et al., 2013; Ma et al., 2019)
Tubulin beta		443	312	12847	4008264	Protein length from KEGG T01039; I assume 13 tubulin protofilaments per microtubule; per protofilament there are 12 tubulin alpha's and 12 tubulin beta's	(Carbajal-Gonzalez et al., 2013; Ma et al., 2019)
C1a	1700	15454.5	6	448182	2.68909e+06	Mass estimated from EM data	(Carbajal-Gonzalez et al., 2013)
C1b	1900	17272.7	6	500909	3.00545e+06	Mass estimated from EM data	(Carbajal-Gonzalez et al., 2013)
C1c	1900	17272.7	3	500909	1.50273e+06	Mass estimated from EM data	(Carbajal-Gonzalez et al., 2013)
C1d-top	1200	10909.1	3	316364	949091	Mass estimated from EM data	(Carbajal-Gonzalez et al., 2013)
C1d-bottom	1400	12727.3	3	369091	1.10727e+06	Mass estimated from EM data	(Carbajal-Gonzalez et al., 2013)
C1e	550	5000	3	145000	435000	Mass estimated from EM data	(Carbajal-Gonzalez et al., 2013)
C1f	1650	15000	3	435000	1305000	Mass estimated from EM data	(Carbajal-Gonzalez et al., 2013)
C2a	1750	15909.1	6	461364	2.76818e+06	Mass estimated from EM data	(Carbajal-Gonzalez et al., 2013)
C2b	1150	10454.5	6	303182	1.81909e+06	Mass estimated from EM data	(Carbajal-Gonzalez et al., 2013)
C2c	550	5000	6	145000	870000	Mass estimated from EM data	(Carbajal-Gonzalez et al., 2013)
C2d	400	3636.36	6	105455	632727	Mass estimated from EM data	(Carbajal-Gonzalez et al., 2013)
C2e	400	3636.36	6	105455	632727	Mass estimated from EM data	(Carbajal-Gonzalez et al., 2013)
MIP-C2a	50	454.545	6	13181.8	79090.9	Mass estimated from EM data	(Carbajal-Gonzalez et al., 2013)
MIP-C2b	35	318.182	12	9227.27	110727	Mass estimated from EM data	(Carbajal-Gonzalez et al., 2013)
				Cost central pair per 96 nm (ATP)	2.59951e+07
Cost of axoneme per 96 nm (ATP)
	1.56305e+08
Cost of flagellar membrane
Cost of membrane for 1 flagellum (ATP)	12500000000	Includes membrane proteins; Flagellum length 11 um and width 0.25 um
Cost of interflagellar transport (IFT)
		References
Number of IFT particles per flagellum	279	(Vannuccini et al., 2016)
Volume of a single IFT particle (µm3)	5e-06	(Vannuccini et al., 2016)
Volume per amino acid (µm3 AA-1)	1.3334e-10
Number of amino acids per IFT particle	37498.1
Total number of amino acids per flagellum	1.0462e+07
Energy cost per IFT particle (ATP)	1.08745e+06
Energy cost per flagellum (ATP)	3.03397e+08
References
Barber, C. F., Heuser, T., Carbajal-Gonzalez, B. I., Botchkarev, V. V., & Nicastro, D. (2012). Three-dimensional structure of the radial spokes reveals heterogeneity and interactions with dyneins in Chlamydomonas flagella. Molecular Biology of the Cell, 23(1), 111-120. https://doi.org/10.1091/mbc.E11-08-0692
Carbajal-Gonzalez, B. I., Heuser, T., Fu, X. F., Lin, J. F., Smith, B. W., Mitchell, D. R., & Nicastro, D. (2013). Conserved structural motifs in the central pair complex of eukaryotic flagella. Cytoskeleton, 70(2), 101-120. https://doi.org/10.1002/cm.21094
Dymek, E. E., & Smith, E. F. (2007). A conserved CaM and radial spoke-associated complex mediates regulation of flagellar dynein activity. Journal of Cell Biology, 179(3), 515-526. https://doi.org/10.1083/jcb.200703107
Heuser, T., Barber, C. F., Lin, J. F., Krell, J., Rebesco, M., Porter, M. E., & Nicastro, D. (2012). Cryoelectron tomography reveals doublet-specific structures and unique interactions in the I1 dynein. Proceedings of the National Academy of Sciences of the United States of America, 109(30), E2067-E2076. https://doi.org/10.1073/pnas.1120690109
Heuser, T., Raytchev, M., Krell, J., Porter, M. E., & Nicastro, D. (2009). The dynein regulatory complex is the nexin link and a major regulatory node in cilia and flagella. Journal of Cell Biology, 187(6), 921-933. https://doi.org/10.1083/jcb.200908067
King, S. M. (2013). A solid-state control system for dynein-based ciliary/flagellar motility. Journal of Cell Biology, 201(2), 173-175. https://doi.org/10.1083/jcb.201302077
King, S. M. (2016). Axonemal Dynein Arms. Cold Spring Harbor Perspectives in Biology, 8(11), Article a028100. https://doi.org/10.1101/cshperspect.a028100
King, S. M., & Patel-King, R. S. (2015). The Oligomeric Outer Dynein Arm Assembly Factor CCDC103 Is Tightly Integrated within the Ciliary Axoneme and Exhibits Periodic Binding to Microtubules. Journal of Biological Chemistry, 290(12), 7388-7401. https://doi.org/10.1074/jbc.M114.616425
Ma, M. S., Stoyanova, M., Rademacher, G., Dutcher, S. K., Brown, A., & Zhang, R. (2019). Structure of the Decorated Ciliary Doublet Microtubule. Cell, 179(4), 909-922. https://doi.org/10.1016/j.cell.2019.09.030
Pigino, G., Bui, K. H., Maheshwari, A., Lupetti, P., Diener, D., & Ishikawa, T. (2011). Cryoelectron tomography of radial spokes in cilia and flagella. Journal of Cell Biology, 195(4), 673-687. https://doi.org/10.1083/jcb.201106125
Vannuccini, E., Paccagnini, E., Cantele, F., Gentile, M., Dini, D., Fino, F., . . . Lupetti, P. (2016). Two classes of short intraflagellar transport train with different 3D structures are present in Chlamydomonas flagella. Journal of Cell Science, 129(10), 2064-2074. https://doi.org/10.1242/jcs.183244
Yamamoto, R., Song, K. K., Yanagisawa, H., Fox, L., Yagi, T., Wirschell, M., . . . Sale, W. S. (2013). The MIA complex is a conserved and novel dynein regulator essential for normal ciliary motility. Journal of Cell Biology, 201(2), 263-278. https://doi.org/10.1083/jcb.201211048
